# Supplementary material for: Whole-exome sequencing reveals the origin and evolution of hepato-cholangiocarcinoma
Source: PubMed Central journal article supplement (PMC5832792; doi:10.1038/s41467-018-03276-y), 2018-03-01
Supplement: 41467_2018_3276_MOESM1_ESM.pdf [file 41467_2018_3276_MOESM1_ESM.pdf]

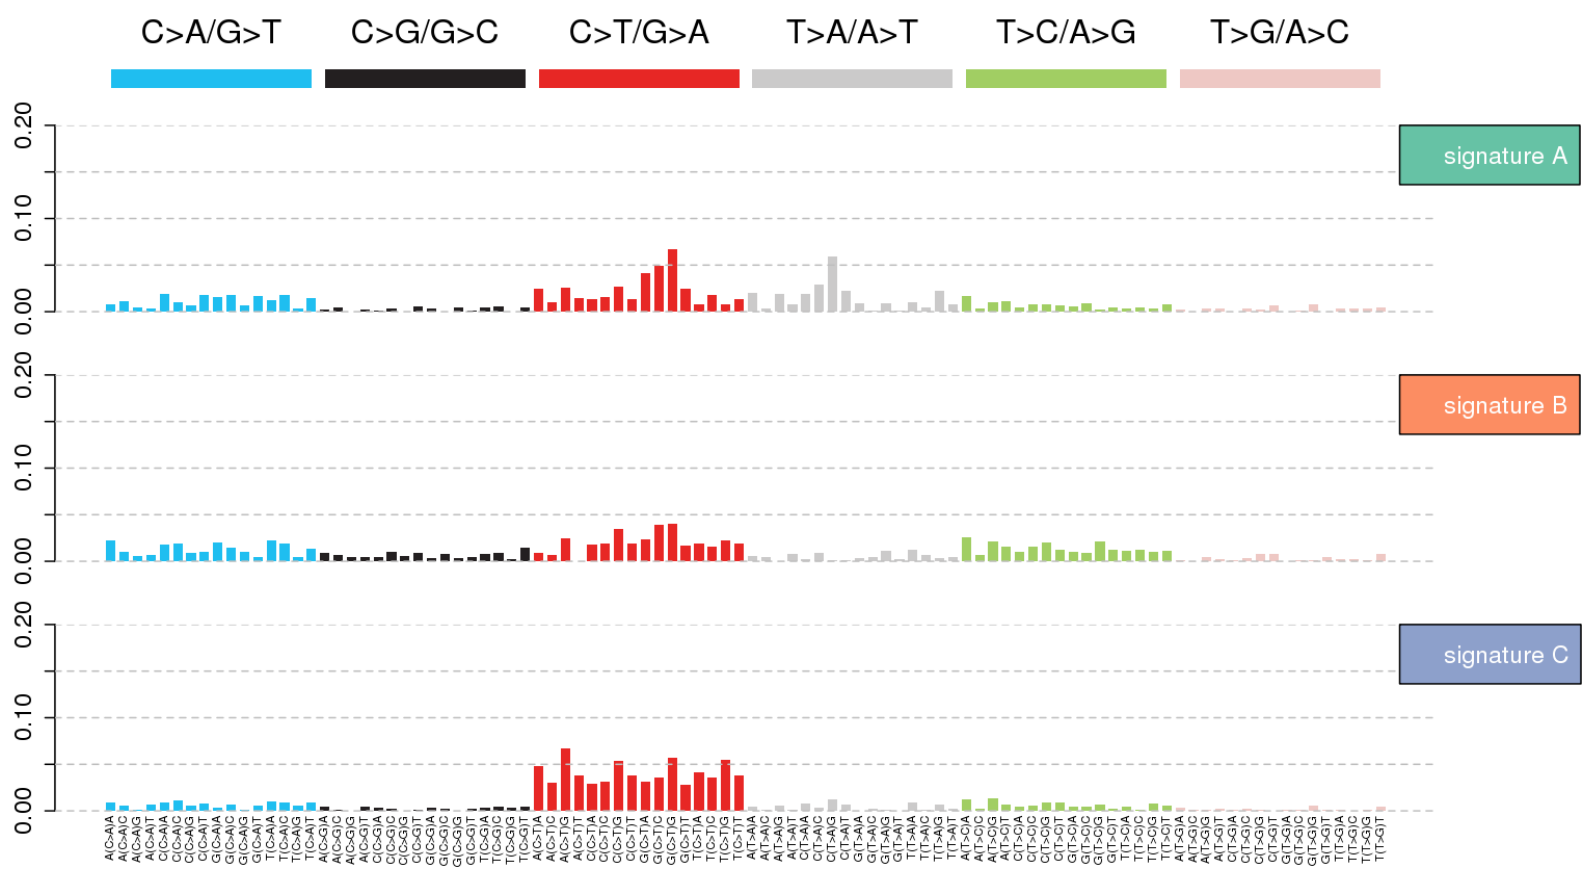

**Supplementary Figure 1: mutation signatures of all tumor samples**

**Legend:** The chart shows three mutation signatures of all tumor samples. X-axis represents 96 mutation types. Signature A, signature B and signature C indicate three different mutation signatures.

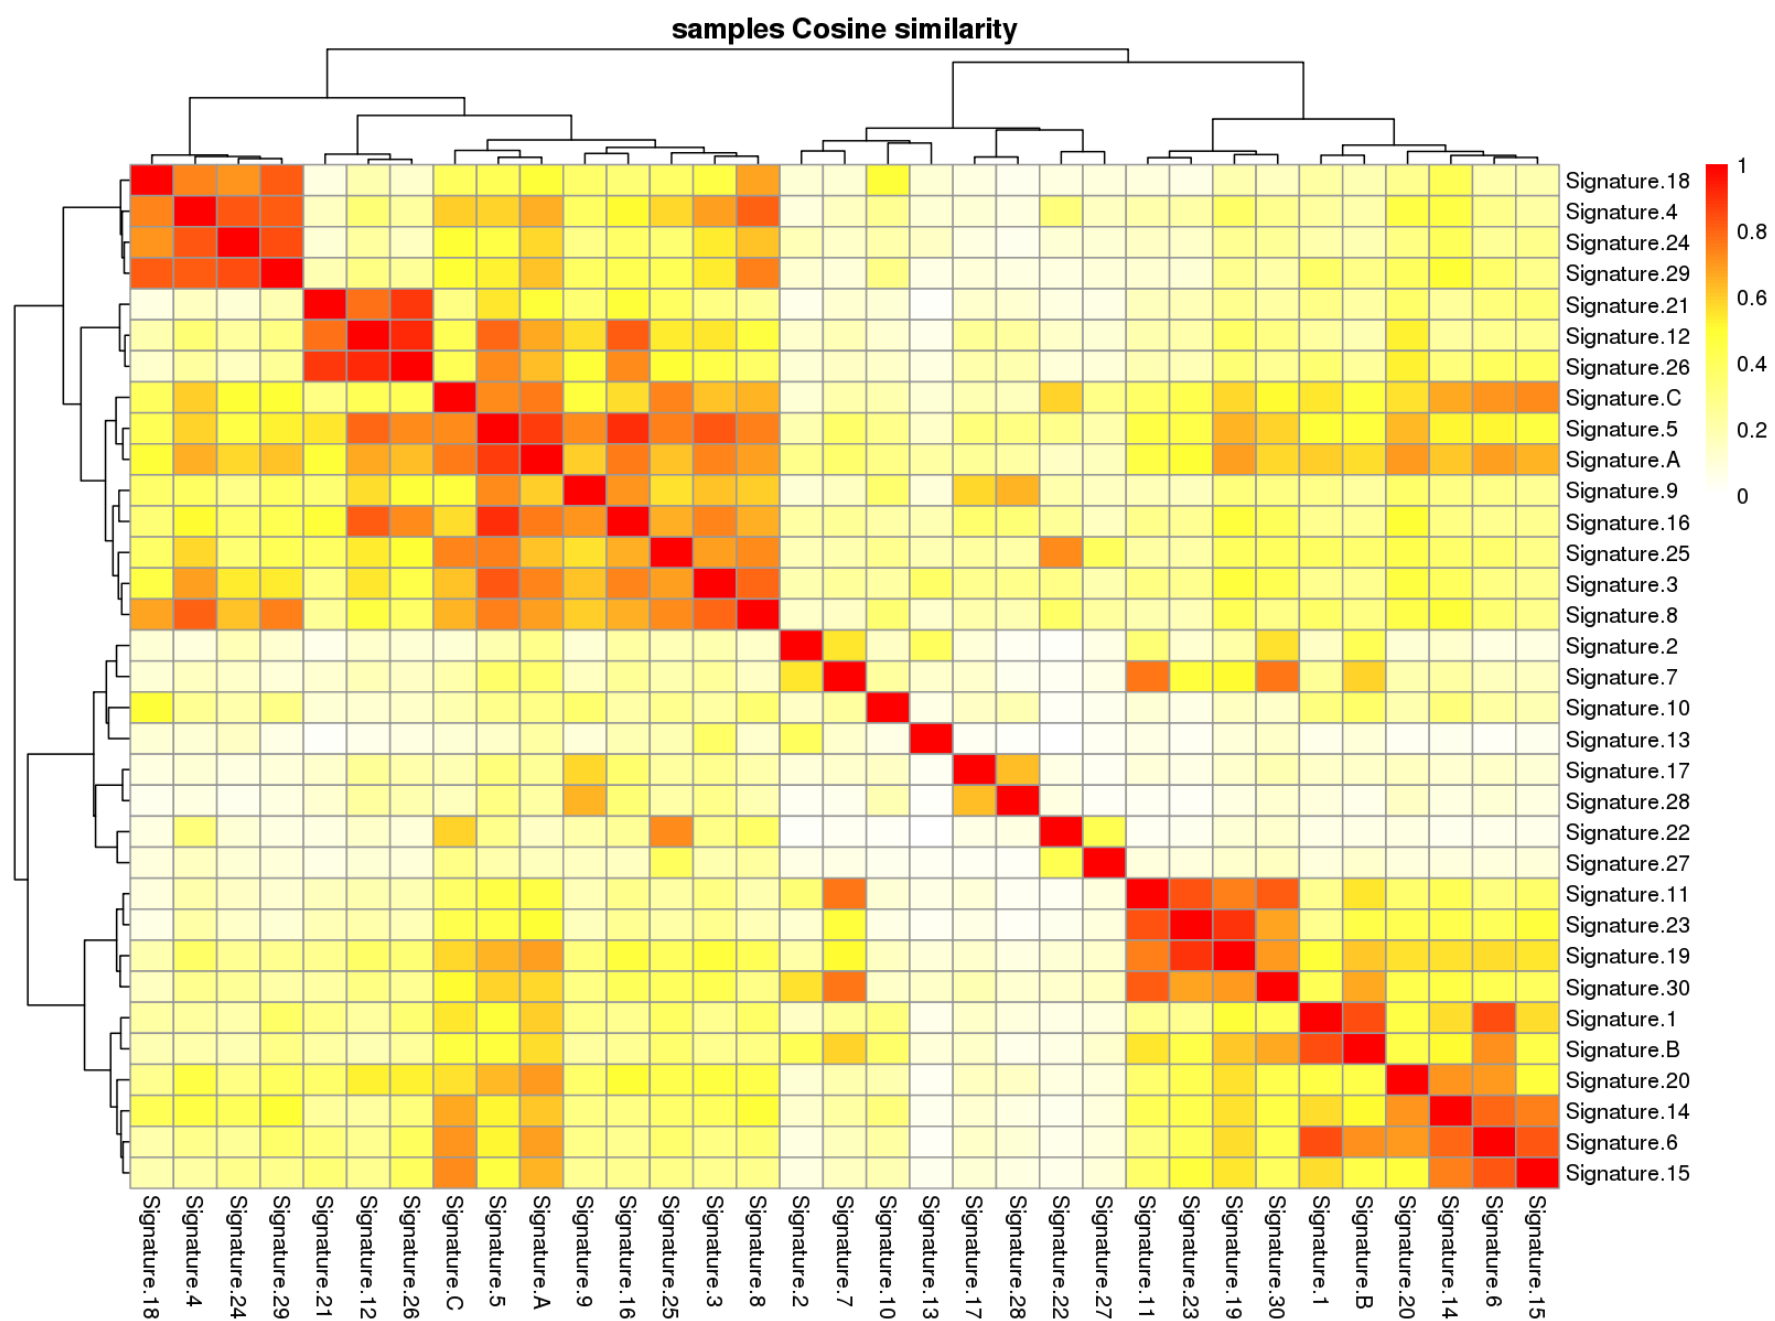

**Supplementary Figure 2: Cosine similarity heatmap of identified signatures and known signatures**

**Legend:** The plot indicates the cosine similarity of signature A, B, C and 30 known signatures. Color from white to red represents different similarity from low to high. The letter and sequential number represent identified signature and known signature respectively.

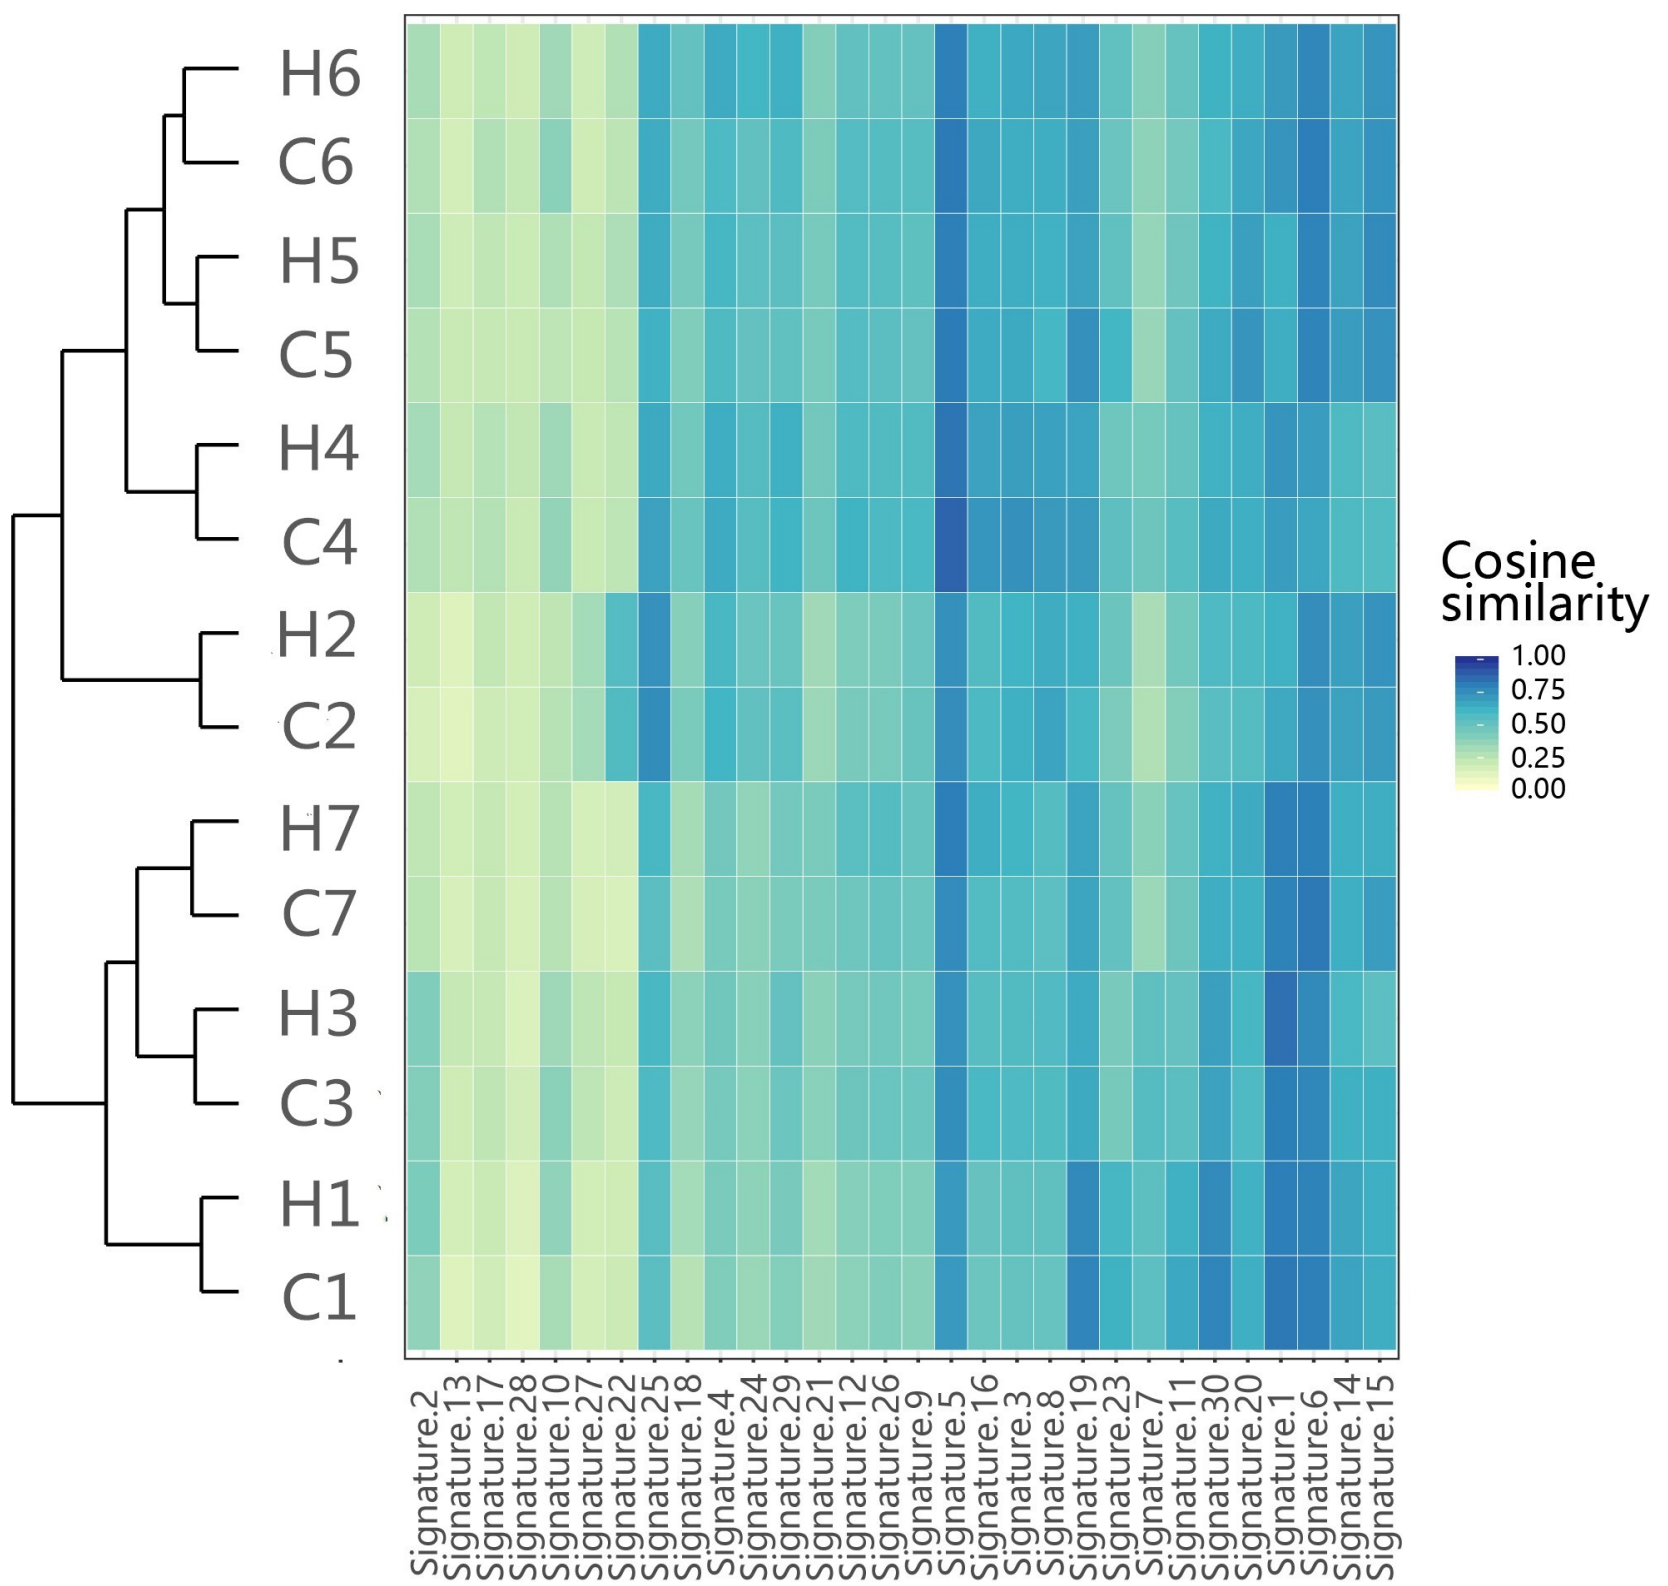

**Supplementary Figure 3: The similarity between each mutational profile and each COSMIC signature**

**Legend:** The X-axis represent the 30 known signatures and the Y-axis represent different tumor samples.

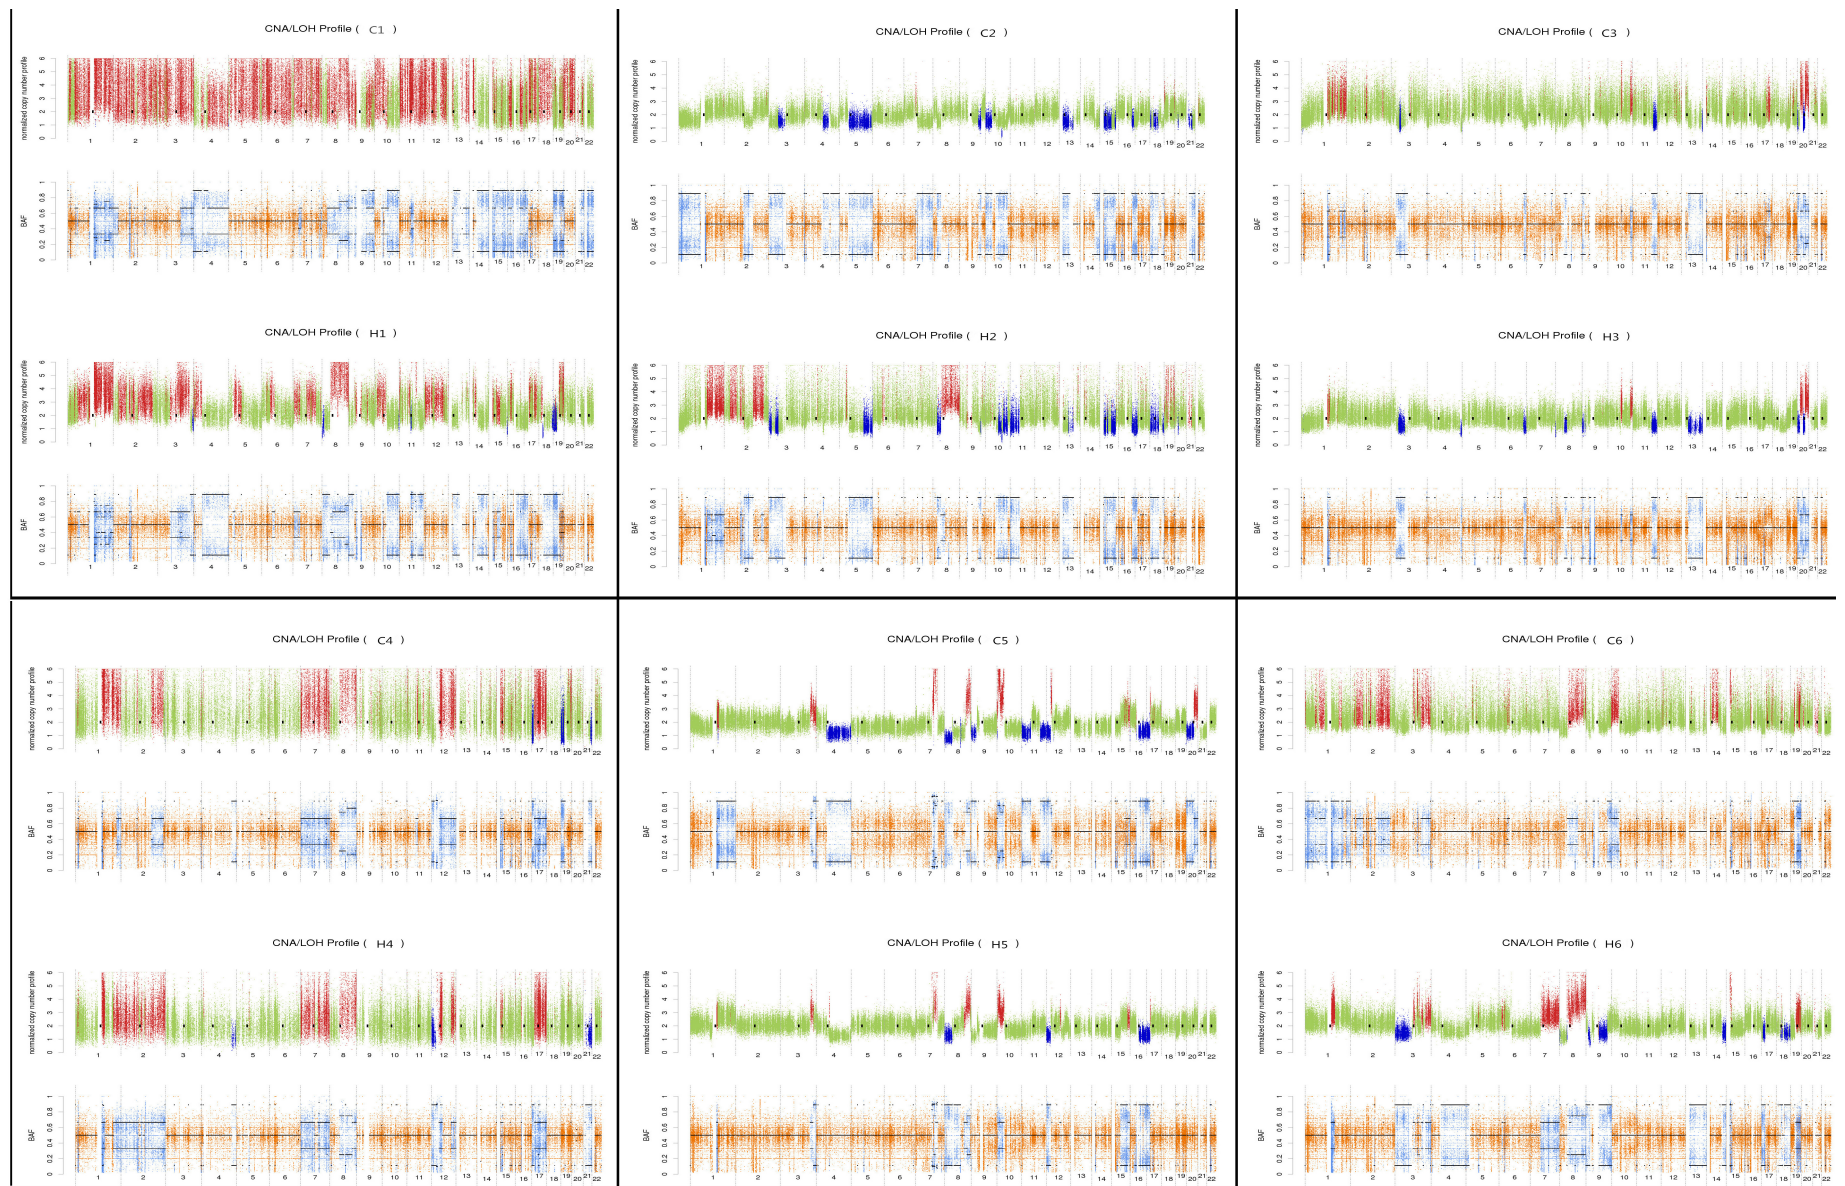

**Supplementary Figure 4: Profile of somatic copy number variation on exome data**

**Legend:** The upper chart depicts the distribution of somatic copy number variation (CNV). Red is for CNV gain, green for normal CNV and blue for CNV loss. The below chart depicts distribution of B allele frequency (BAF). Orange represents consistent distribution of allele and blue indicates loss of heterozygosity (LOH)

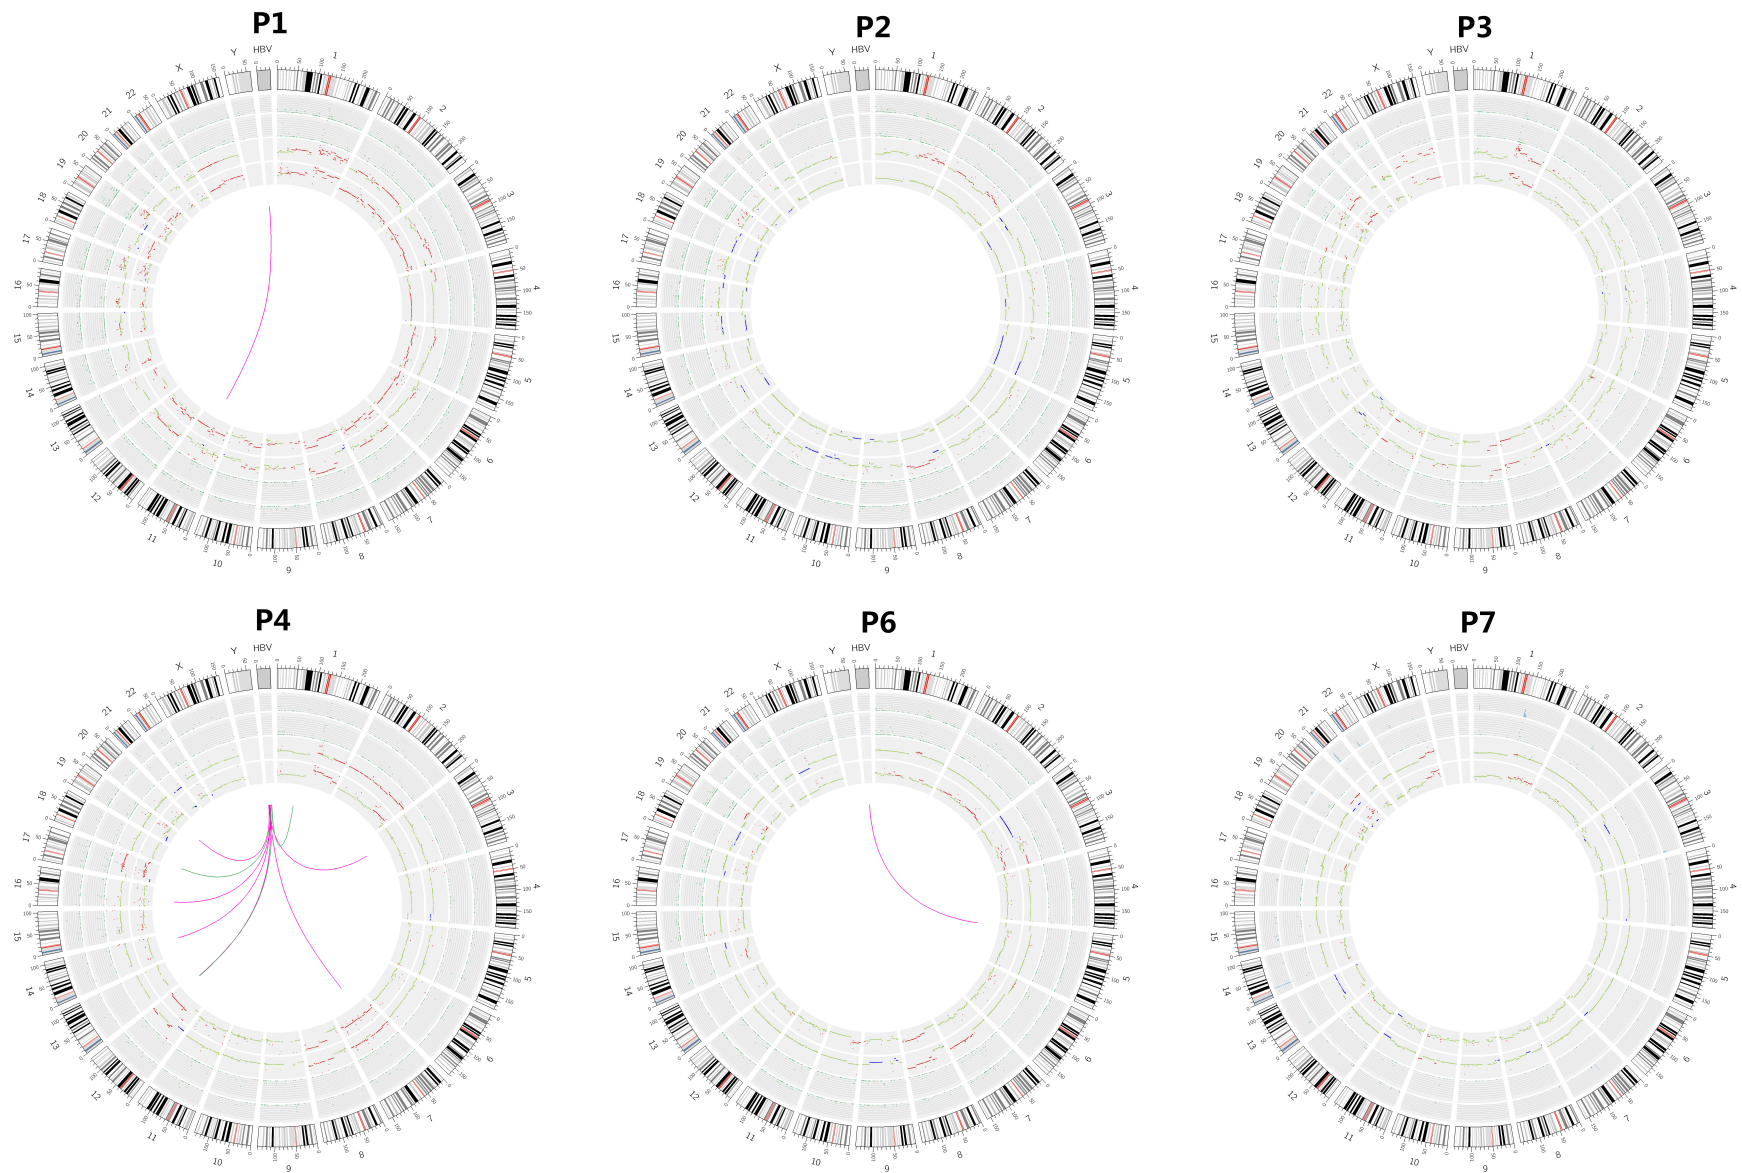

**Supplementary Figure 5: Clonal relationship between HCC and iCCA components**

**Legend:** Circos plot depicts the relationship between HCC and iCCA components on the terms of somatic nucleotide variant (SNV), somatic insertions and deletions, somatic copy number variation (CNV) and HBV integration. The first and second circles represent CNV for iCCA and HCC. Red indicates CNV gain, green normal CNV and blue CNV loss. The third and fourth circles represent SNV and indel for iCCA and HCC. Green dot indicates SNV and indel. Red curve indicates HBV integration sites for HCC.

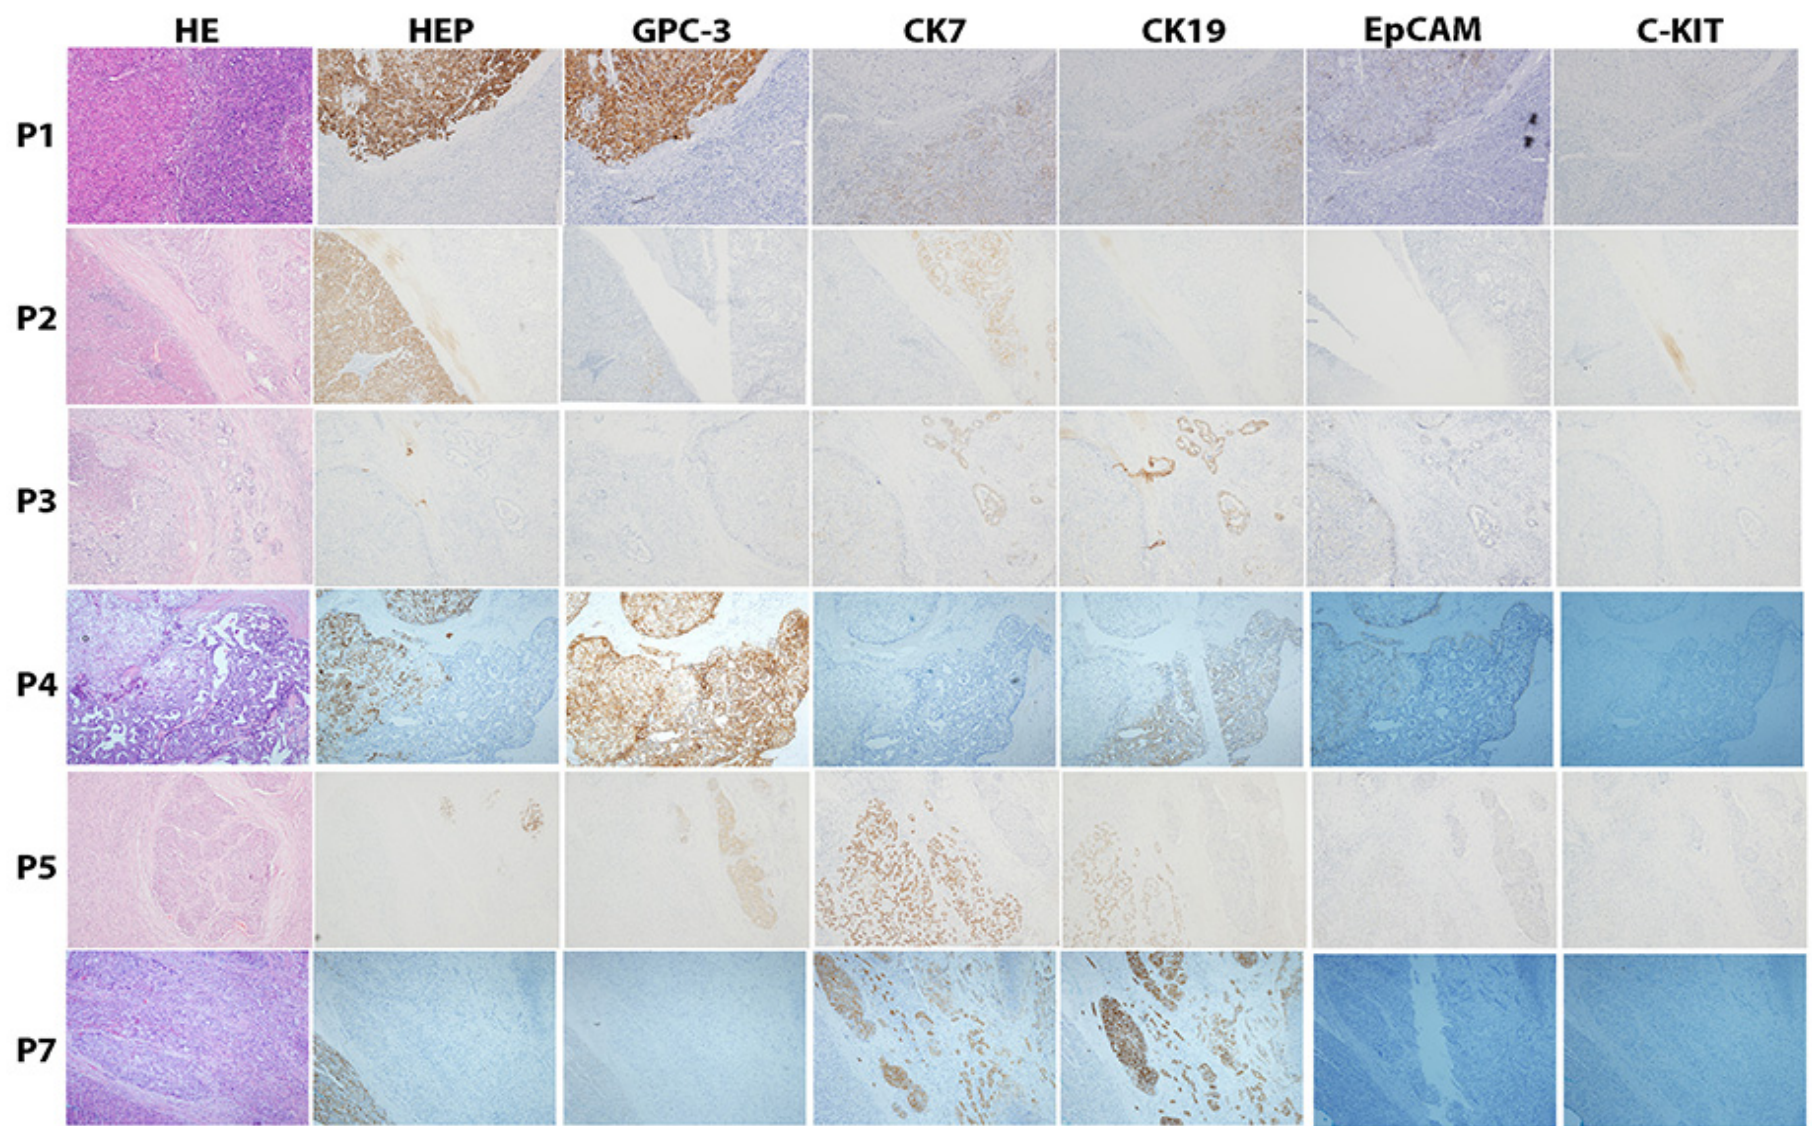

Supplementary Figure 6: the pathological features of H-ChC samples

**Supplementary Table 1: Immunohistochemical profiles of liver cancer**

|              | Hep | GPC-3 | Hep/GPC-3 | CK7 | CK19 | CK7/CK19 | EpCAM | c-kit |
|--------------|-----|-------|-----------|-----|------|----------|-------|-------|
| H-ChC (n=15) | 8   | 9     | 12        | 12  | 12   | 14       | 13    | 0     |
| HCC (n=32)   | 28  | 21    | 30        | 6   | 3    | 8        | 7     | 0     |
| iCCA (n=28)  | 2   | 2     | 4         | 26  | 27   | 27       | 20    | 1     |

**Supplementary Table 2: Information of whole exome sequencing of 21 samples in 7 H-ChC patients**

| Sample | Average sequencing depth on target | Coverage of target region | fraction of target covered with at least 20x |
|--------|------------------------------------|---------------------------|----------------------------------------------|
| N1     | 135.34                             | 99.90%                    | 99.50%                                       |
| C1     | 152.01                             | 99.90%                    | 99.50%                                       |
| H1     | 135.09                             | 99.90%                    | 99.60%                                       |
| N2     | 139.83                             | 99.90%                    | 99.20%                                       |
| C2     | 116.97                             | 99.90%                    | 98.80%                                       |
| H2     | 96.2                               | 99.90%                    | 98.80%                                       |
| N3     | 93.01                              | 99.90%                    | 98.90%                                       |
| C3     | 135.16                             | 99.90%                    | 98.20%                                       |
| H3     | 166.2                              | 99.80%                    | 98.30%                                       |
| N4     | 107.33                             | 99.90%                    | 98%                                          |
| C4     | 155.12                             | 99.90%                    | 99.30%                                       |
| H4     | 139.39                             | 99.80%                    | 98.30%                                       |
| N5     | 123.44                             | 99.90%                    | 99.50%                                       |
| C5     | 150.44                             | 99.90%                    | 99.50%                                       |
| H5     | 129.71                             | 99.90%                    | 99.40%                                       |
| N6     | 144.47                             | 99.90%                    | 99.20%                                       |
| C6     | 137.81                             | 99.90%                    | 99.60%                                       |
| H6     | 178.73                             | 99.90%                    | 99.60%                                       |
| N7     | 109.06                             | 99.60%                    | 99%                                          |
| C7     | 118.97                             | 99.60%                    | 99.10%                                       |
| H7     | 215.6                              | 99.70%                    | 99.50%                                       |

**Supplementary Table 3: the HBV integration of tumor components**

| Sample | Flag | chr | site     | read sequence                                                                                                                                                 |
|--------|------|-----|----------|---------------------------------------------------------------------------------------------------------------------------------------------------------------|
| H1     | 161  | 11  | 73830175 | AAACTCCTGGGCTCAAGTGATCTGCCATCTCAGCCTCCCAAAGTGCTGGAATTACAGGCA<br>TGAGCCACCGTACCCAGCCAAGACTACTTTTTGTCACCATTCTATACTACAAATGATTCATT<br>CTGCTTTTAATCTTGCTAAAATGAACT |
|        | 161  | 11  | 73830178 | GAGTCCTGGGCTCAAGTGATCTGCCATCTCAGCCCCCACAGTGCTGGAATTAGAGGCA<br>AGAGCCACCGTACCCAGCCAAGACTACTTTTTGTCACCATTCTATACTACAAATGATTCATT<br>CTGCTTTTAATCTTGCTAAAATGAACT   |
| C4     | 161  | 1   | 87262301 | CAGCCTAGGAACTCTTTTTAACTCTTTTTTCTATGATAAAATATCCAGATTTGATTCTTCAT<br>CAAAGGACCTTTCCTCACAATTAGTCAACTGCAAAGTACTCAGAGCACAAGGCAGCTGCTT<br>TTCTAAAAGAAATCTCTATTTCAGA  |
|        | 129  | 18  | 9255787  | TTGAAAAAGAAAAGAAGATAAAACATGAGCATAAGTCAGAAAAAGACAAATTAGATCTTA                                                                                                  |

|    |     |    |           |                                                                                                                                                                |
|----|-----|----|-----------|----------------------------------------------------------------------------------------------------------------------------------------------------------------|
|    |     |    |           | GTGAATGTGTTGATAAAAATAAAAGAAAAGGACAAGCTATATTCGCATCACACAGAAAAAT<br>GCCATAAAGAAGGTGAGAAGAGCAAAAAATA                                                               |
| H4 | 97  | 3  | 63600958  | AGACCGGCTGGCATTCTTCGGGACAGAGATATCTTTCAGATCCAATGGAGAAGCACTCCAG<br>CAGCTATAATCAAGGTGGTTACAACCAAGACAGCTATGGATCAAGCAGTGGGTACAGTCA<br>GCAGGCGAGTTTGGGGCCAACCTCAGATG |
|    | 65  | 7  | 54617638  | CTTCAGGAACACAAGGCCAGGCCTATCTGAAAAGTCAATGCCAACAGCCATGCCCGCAGA<br>ATGCAGGCCTTCGAAGCCTCGCCCATGTGGCTGCAGGATATGAAGCCCCGCAAGAACGTCT<br>CCGCAGCCATCCCAGCAGCATCCATGGC  |
|    | 65  | 12 | 113629469 | CACAAATGGGCCTCAGGATCTCAGGCCTCCACGTCAGGGGTGACCTTCCGGAGCCCCCTG<br>GTGACTTCCAGGGCTCGCTCAGTTAGCATTTTCAGTGCCATCTACCCCAGCAGAGGTGGGG<br>CCACCCAGAAACCAAGCCCCCTTGAA    |
|    | 161 | 14 | 70381786  | TGTTGGCCAGGCTGGTCTCCAACCTCCTGACCTCAGGTGATCCACCCGCTTCCAGCTCCAAA<br>GTGCTGGGATTGCAGGCTTGAGTCACCGCGCCCGGCCAGTTTACACATTCTGTCTCAAAC<br>TCCAACACATTGGTCTCTCTTCA      |
|    | 161 | 16 | 25182094  | GTACAACAGTTACCTCGAGCTGAAGTGAGCAGGTATGGGGTTGGTGAGCGTCAGCTTGAT<br>GGGCATTCAATTGTAACCAAGGCATGATTGCCAGTATTCTTTCATGCAGAAAAACAGAAC<br>AATATGTGGAGATTTCAATTATGCCTTTG  |
|    | 161 | 20 | 23213732  | CCCTCTCCACGTCCCCGTGGCACTTTGCTCATGAGGCTATCAGAGAATGTCTCAGACCACGT<br>GGATCATGTTGGGGCCCAACCCAGCTGTGACTGCTGTCCAGGCCTTGTGTAGGAAGTGA<br>GGGCAGGCTGGGGCAGGGCTTTGCGGG   |
| C5 | 129 | 15 | 49833908  | TCACCAGCACCATGCCTAAATCTTCTTAAATTCATCATTAAAAAGGTAACCTCGATTCTGGA<br>AATGCTTCATAGAACGTTGCATATATGGCTTGTGCCAAACAATCAGCATATATCTACAAA<br>ATAAAATCAAATTAGATTAATTTTATA  |
| H5 | 161 | 3  | 181874865 | CAATTGCAAATGCAGCAATCACCTACCTTCTGCCTCGATCTTGCTGGGAACACTACAGACTGG<br>CACTCTTCTATTAGCTATCTTGCAGCCACCTATTTATTTATTTTTATTCTTTTCTCCTTT<br>TGAGGAGGCATAATAATTACTTCAA   |
|    | 97  | 14 | 36622991  | GCCAGACATGGTGCCTCACCTGTAATTCCAGTGCCTTGGGAGGCCAAGGTGGGAAGATTGT<br>TCAAGCCCTGGAGTTTGAGAACAGCTTGGGCAACGTGTGAGACTCCATCTCTCAAAAAAA<br>ATACAAAAATTAGCCAGTTGTGATGGTG  |
|    | 129 | 15 | 49833908  | GTAAGGAGGCTGTAGGCATAAATTGGTCTGTTACCAGCACCATGCCTAAATCTTCTTTA<br>AATTCATCATTAAAAAGGTAACCTCGATTCTGGAAATGCTTCATAGAACGTTGCATATATGG<br>CTTGTGCCAAACAATCAGCATATATCT   |
|    | 129 | 15 | 49833912  | TGTAGGCATAAATTGGTCTGTGCACCAGCACCATGCCTAAATCGTCTTTAAAGTCATCATT<br>AAAAGGTAACCTCGAGTCTGGCAATGCTTCATAGAACGTTGCATATATGGCTTGTGCCAAAC<br>AATCAGCATATATCTACCAAATAAAA  |
|    | 65  | 15 | 49833933  | AGGTAACCTCGATTCTGGAAATGCTTCATAGAACGTTGCATATATGGCTTGTGCCAAACAAT<br>CAGCATATATCTACCAAATAAAAATCAAATTAGATTAATTTTATATTTTAAATTTAATAT<br>ATGTCAGCTGCCAAAGAAATTATTATT  |
|    | 129 | 15 | 49833992  | ATCAGCATATATCTACCAAATAAAAAAGAATGAGATTAATCTTATATTTTAAATATTAAT<br>CAATATCACCTGCAAAAAGAAATTATTACTTTAAATATGCCTTGCAATTTATTAACCGAAT<br>AAATATTCGCCAGTTTAAATCGTA      |
| H6 | 129 | 5  | 17704483  | AACAAACCCTATTTTGTAAAGGGAAAAACACTTTTCAAATTGCATGGTGTGGTGAACACA<br>CCAATTTATGCCTACAGCCTCGTAATGATTAACCTACATACAAAGACCTTTAACCTAACCTCC<br>TCCCCAACTCCTCCCACTCATTAAAC  |

**Supplementary Table 4:** Distribution of driver mutations of 7 H-ChC patients

| Patient | Hugo_Symbol | Chromosome | Position          | Variant_Classification | Variant_Type                                            | Gene_Description                                       |
|---------|-------------|------------|-------------------|------------------------|---------------------------------------------------------|--------------------------------------------------------|
| P1      | PTPRC       | 1          | 198718543         | Splice_Site            | SNP                                                     | protein tyrosine phosphatase, receptor type, C         |
|         | LRIF1       | 1          | 111494203         | Missense_Mutation      | SNP                                                     | ligand dependent nuclear receptor interacting factor 1 |
|         | EML4        | 2          | 42553333          | Missense_Mutation      | SNP                                                     | echinoderm microtubule associated protein like 4       |
|         | AKAP9       | 7          | 91708531          | Nonsense_Mutation      | SNP                                                     | A kinase (PRKA) anchor protein 9                       |
|         | FGFR1       | 8          | 38297829          | Missense_Mutation      | SNP                                                     | fibroblast growth factor receptor 1                    |
|         | USP28       | 11         | 113702667         | Missense_Mutation      | SNP                                                     | ubiquitin specific peptidase 28                        |
|         | MEF2A       | 15         | 100214595         | Splice_Site            | SNP                                                     | myocyte enhancer factor 2A                             |
| GRIN2A  | 16          | 9934887    | Missense_Mutation | SNP                    | glutamate receptor, ionotropic, N-methyl D-aspartate 2A |                                                        |



|       |          |         |                   |                   |                              |                                                                                              |
|-------|----------|---------|-------------------|-------------------|------------------------------|----------------------------------------------------------------------------------------------|
|       | CDH1     | 16      | 68867343          | Missense_Mutation | SNP                          | cadherin 1, type 1, E-cadherin (epithelial)                                                  |
|       | TP53     | 17      | 7579466           | Frame_Shift_Del   | DEL                          | tumor protein p53                                                                            |
|       | ARHGAP35 | 19      | 47424519          | Missense_Mutation | SNP                          | Rho GTPase activating protein 35                                                             |
|       | NF2      | 22      | 30000099          | Nonsense_Mutation | SNP                          | neurofibromin 2 (merlin)                                                                     |
|       | HUWE1    | X       | 53622340          | Missense_Mutation | SNP                          | HECT, UBA and WWE domain containing 1, E3 ubiquitin protein ligase                           |
| P2    | H3F3A    | 1       | 226259113         | Missense_Mutation | SNP                          | H3 histone, family 3A                                                                        |
|       | CBLB     | 3       | 105459347         | Missense_Mutation | SNP                          | Cbl proto-oncogene B, E3 ubiquitin protein ligase                                            |
|       | PTPN13   | 4       | 87701584          | Missense_Mutation | SNP                          | protein tyrosine phosphatase, non-receptor type 13 (APO-1/CD95 (Fas)-associated phosphatase) |
|       | CARD11   | 7       | 2962791           | Missense_Mutation | SNP                          | caspase recruitment domain family, member 11                                                 |
|       | SND1     | 7       | 127714722         | Missense_Mutation | SNP                          | staphylococcal nuclease and tudor domain containing 1                                        |
|       | TCEA1    | 8       | 54900719          | Missense_Mutation | SNP                          | transcription elongation factor A (SII), 1                                                   |
|       | SPTAN1   | 9       | 131339476         | Missense_Mutation | SNP                          | spectrin, alpha, non-erythrocytic 1                                                          |
|       | ZFX3     | 16      | 72992087          | Missense_Mutation | SNP                          | zinc finger homeobox 3                                                                       |
|       | OLIG2    | 21      | 34400039          | Missense_Mutation | SNP                          | oligodendrocyte lineage transcription factor 2                                               |
|       | DMD      | X       | 32383144          | Missense_Mutation | SNP                          | dystrophin                                                                                   |
| P3    | SOS1     | 2       | 39234285          | Nonsense_Mutation | SNP                          | son of sevenless homolog 1 (Drosophila)                                                      |
|       | ZFP36L2  | 2       | 43452447          | Missense_Mutation | SNP                          | ZFP36 ring finger protein-like 2                                                             |
|       | ACKR3    | 2       | 237489593         | Missense_Mutation | SNP                          | atypical chemokine receptor 3                                                                |
|       | ACVR2A   | 2       | 148680663         | Missense_Mutation | SNP                          | activin A receptor, type IIA                                                                 |
|       | FOXP1    | 3       | 71090546          | Missense_Mutation | SNP                          | forkhead box P1                                                                              |
|       | CACNA1D  | 3       | 53844020          | Missense_Mutation | SNP                          | calcium channel, voltage-dependent, L type, alpha 1D subunit                                 |
|       | PIK3CB   | 3       | 138461563         | Missense_Mutation | SNP                          | phosphatidylinositol-4,5-bisphosphate 3-kinase, catalytic subunit beta                       |
|       | PDGFRA   | 4       | 55151580          | Missense_Mutation | SNP                          | platelet-derived growth factor receptor, alpha polypeptide                                   |
|       | METAP1   | 4       | 99955468          | Missense_Mutation | SNP                          | methionyl aminopeptidase 1                                                                   |
|       | HOOK3    | 8       | 42828543          | Splice_Site       | SNP                          | hook microtubule-tethering protein 3                                                         |
|       | ERCC4    | 16      | 14031664          | Missense_Mutation | SNP                          | excision repair cross-complementation group 4                                                |
|       | TP53     | 17      | 7578492           | Frame_Shift_Del   | DEL                          | tumor protein p53                                                                            |
| PRPF8 | 17       | 1580871 | Missense_Mutation | SNP               | pre-mRNA processing factor 8 |                                                                                              |
| P4    | RBM15    | 1       | 110883694         | Missense_Mutation | SNP                          | RNA binding motif protein 15                                                                 |
|       | AFF3     | 2       | 100623895         | Missense_Mutation | SNP                          | AF4/FMR2 family, member 3                                                                    |
|       | NEB      | 2       | 152471104         | Splice_Site       | SNP                          | nebulin                                                                                      |
|       | QKI      | 6       | 163987774         | Missense_Mutation | SNP                          | QKI, KH domain containing, RNA binding                                                       |
|       | SYNE1    | 6       | 152576061         | Missense_Mutation | SNP                          | spectrin repeat containing, nuclear envelope 1                                               |
|       | FANCC    | 9       | 97876991          | Frame_Shift_Del   | DEL                          | Fanconi anemia, complementation group C                                                      |
|       | KAT6B    | 10      | 76602916          | Missense_Mutation | SNP                          | K(lysine) acetyltransferase 6B                                                               |
|       | MYO5A    | 15      | 52675324          | Missense_Mutation | SNP                          | myosin VA (heavy chain 12, myosin)                                                           |
|       | TP53     | 17      | 7577534           | Missense_Mutation | SNP                          | tumor protein p53                                                                            |
|       | MED13    | 17      | 60060470          | Missense_Mutation | SNP                          | mediator complex subunit 13                                                                  |
|       | RBM10    | X       | 47039693          | Missense_Mutation | SNP                          | RNA binding motif protein 10                                                                 |
| P5    | MTOR     | 1       | 11307750          | Missense_Mutation | SNP                          | mechanistic target of rapamycin (serine/threonine kinase)                                    |
|       | ACVR2A   | 2       | 148677851         | Missense_Mutation | SNP                          | activin A receptor, type IIA                                                                 |
|       | KALRN    | 3       | 124153349         | Missense_Mutation | SNP                          | kalirin, RhoGEF kinase                                                                       |

|       |         |          |                   |                   |                                                                    |                                                                                              |
|-------|---------|----------|-------------------|-------------------|--------------------------------------------------------------------|----------------------------------------------------------------------------------------------|
|       | SYNE1   | 6        | 152555004         | Missense_Mutation | SNP                                                                | spectrin repeat containing, nuclear envelope 1                                               |
|       | RUNX1T1 | 8        | 93029564          | Missense_Mutation | SNP                                                                | runt-related transcription factor 1; translocated to, 1 (cyclin D-related)                   |
|       | JMJD1C  | 10       | 65024454          | Missense_Mutation | SNP                                                                | jumonji domain containing 1C                                                                 |
|       | CIITA   | 16       | 11016346          | Missense_Mutation | SNP                                                                | class II, major histocompatibility complex, transactivator                                   |
|       | MED13   | 17       | 60060470          | Missense_Mutation | SNP                                                                | mediator complex subunit 13                                                                  |
|       | NFATC2  | 20       | 50140613          | Missense_Mutation | SNP                                                                | nuclear factor of activated T-cells, cytoplasmic, calcineurin-dependent 2                    |
|       | 5-Sep   | 22       | 19707175          | Missense_Mutation | SNP                                                                | septin 5                                                                                     |
| P6    | ASPM    | 1        | 197073312         | Missense_Mutation | SNP                                                                | asp (abnormal spindle) homolog, microcephaly associated (Drosophila)                         |
|       | LMNA    | 1        | 156106013         | Missense_Mutation | SNP                                                                | lamin A/C                                                                                    |
|       | AHDC1   | 1        | 27874065          | Missense_Mutation | SNP                                                                | AT hook, DNA binding motif, containing 1                                                     |
|       | FBXO11  | 2        | 48060168          | Missense_Mutation | SNP                                                                | F-box protein 11                                                                             |
|       | GMPS    | 3        | 155654183         | Missense_Mutation | SNP                                                                | guanine monphosphate synthase                                                                |
|       | PTPN13  | 4        | 87637723          | Missense_Mutation | SNP                                                                | protein tyrosine phosphatase, non-receptor type 13 (APO-1/CD95 (Fas)-associated phosphatase) |
|       | PIK3R1  | 5        | 67589627          | Missense_Mutation | SNP                                                                | phosphoinositide-3-kinase, regulatory subunit 1 (alpha)                                      |
|       | APC     | 5        | 112173481         | Missense_Mutation | SNP                                                                | adenomatous polyposis coli                                                                   |
|       | NIPBL   | 5        | 37064849          | Missense_Mutation | SNP                                                                | Nipped-B homolog (Drosophila)                                                                |
|       | ARID1B  | 6        | 157527922         | Missense_Mutation | SNP                                                                | AT rich interactive domain 1B (SWI1-like)                                                    |
|       | MET     | 7        | 116340324         | Missense_Mutation | SNP                                                                | MET proto-oncogene, receptor tyrosine kinase                                                 |
|       | ADCY1   | 7        | 45697441          | Missense_Mutation | SNP                                                                | adenylate cyclase 1 (brain)                                                                  |
|       | NCOA4   | 10       | 51581274          | Missense_Mutation | SNP                                                                | nuclear receptor coactivator 4                                                               |
|       | TP53BP1 | 15       | 43749192          | Frame_Shift_Del   | DEL                                                                | tumor protein p53 binding protein 1                                                          |
|       | ANKRD11 | 16       | 89350273          | Missense_Mutation | SNP                                                                | ankyrin repeat domain 11                                                                     |
|       | TP53    | 17       | 7577534           | Missense_Mutation | SNP                                                                | tumor protein p53                                                                            |
| HUWE1 | X       | 53607865 | Missense_Mutation | SNP               | HECT, UBA and WWE domain containing 1, E3 ubiquitin protein ligase |                                                                                              |
| P7    | ACSL6   | 5        | 131309062         | Missense_Mutation | SNP                                                                | acyl-CoA synthetase long-chain family member 6                                               |
|       | CHN1    | 2        | 175664864         | Missense_Mutation | SNP                                                                | chimerin 1                                                                                   |
|       | BAP1    | 3        | 52440925          | Splice_Site       | SNP                                                                | BRCA1 associated protein-1 (ubiquitin carboxy-terminal hydrolase)                            |
|       | CDKN2A  | 9        | 21971153          | Nonsense_Mutation | SNP                                                                | cyclin-dependent kinase inhibitor 2A                                                         |
|       | H3F3A   | 1        | 226259113         | Missense_Mutation | SNP                                                                | H3 histone, family 3A                                                                        |

**Supplementary Table 5:** Information of significantly mutated genes for all 21 samples

| Gene    | Indels | SNVs | Tot Muts | Sample Affect | Sample Percent(%) | P-value CT | FDR CT   |
|---------|--------|------|----------|---------------|-------------------|------------|----------|
| TP53    | 4      | 4    | 8        | 8             | 57.14             | 1.89E-18   | 3.63E-14 |
| MUC12   | 0      | 8    | 8        | 4             | 28.57             | 2.30E-08   | 2.20E-04 |
| BAI3    | 0      | 5    | 5        | 3             | 21.43             | 1.95E-07   | 0.001    |
| CACNG4  | 0      | 4    | 4        | 4             | 28.57             | 4.93E-07   | 0.002    |
| IFT122  | 0      | 4    | 4        | 2             | 14.29             | 5.23E-07   | 0.002    |
| DAPK3   | 0      | 4    | 4        | 2             | 14.29             | 6.09E-07   | 0.002    |
| SLITRK3 | 0      | 4    | 4        | 2             | 14.29             | 1.28E-06   | 0.003    |
| ZNF804B | 2      | 2    | 4        | 2             | 14.29             | 2.20E-06   | 0.005    |
| MORC1   | 0      | 4    | 4        | 4             | 28.57             | 2.48E-06   | 0.005    |
| SLC6A20 | 0      | 4    | 4        | 4             | 28.57             | 3.55E-06   | 0.007    |

|           |   |   |   |   |       |          |       |
|-----------|---|---|---|---|-------|----------|-------|
| BBS12     | 2 | 1 | 3 | 3 | 21.43 | 3.95E-06 | 0.007 |
| NFATC3    | 0 | 4 | 4 | 4 | 28.57 | 4.70E-06 | 0.008 |
| UCN3      | 0 | 2 | 2 | 2 | 14.29 | 5.80E-06 | 0.008 |
| GRM1      | 0 | 4 | 4 | 4 | 28.57 | 6.02E-06 | 0.008 |
| PTRH1     | 0 | 2 | 2 | 2 | 14.29 | 7.84E-06 | 0.01  |
| ZNF266    | 0 | 2 | 2 | 2 | 14.29 | 9.97E-06 | 0.011 |
| HDDC2     | 0 | 2 | 2 | 2 | 14.29 | 1.00E-05 | 0.011 |
| ZNF354C   | 0 | 2 | 2 | 2 | 14.29 | 1.11E-05 | 0.012 |
| LYZ       | 0 | 2 | 2 | 2 | 14.29 | 1.29E-05 | 0.013 |
| FCGBP     | 1 | 5 | 6 | 5 | 35.71 | 1.33E-05 | 0.013 |
| HOXC5     | 2 | 0 | 2 | 2 | 14.29 | 1.41E-05 | 0.013 |
| C1orf174  | 2 | 0 | 2 | 2 | 14.29 | 1.72E-05 | 0.013 |
| SYNDIG1   | 0 | 2 | 2 | 2 | 14.29 | 1.75E-05 | 0.013 |
| CAMK2N1   | 0 | 2 | 2 | 2 | 14.29 | 1.69E-05 | 0.013 |
| ANO3      | 0 | 4 | 4 | 3 | 21.43 | 1.59E-05 | 0.013 |
| MAGEB5    | 2 | 0 | 2 | 2 | 14.29 | 1.84E-05 | 0.014 |
| FOCAD     | 0 | 4 | 4 | 4 | 28.57 | 1.95E-05 | 0.014 |
| ITM2A     | 0 | 2 | 2 | 2 | 14.29 | 2.15E-05 | 0.014 |
| OPN1LW    | 0 | 2 | 2 | 2 | 14.29 | 2.13E-05 | 0.014 |
| TUBE1     | 0 | 3 | 3 | 3 | 21.43 | 2.26E-05 | 0.014 |
| C9        | 0 | 2 | 2 | 2 | 14.29 | 2.79E-05 | 0.016 |
| SERPINA10 | 0 | 2 | 2 | 2 | 14.29 | 2.84E-05 | 0.016 |
| POLR2J3   | 0 | 3 | 3 | 2 | 14.29 | 2.74E-05 | 0.016 |
| G6PC      | 2 | 0 | 2 | 2 | 14.29 | 2.96E-05 | 0.017 |
| FREM1     | 0 | 4 | 4 | 4 | 28.57 | 3.57E-05 | 0.02  |
| CEP95     | 0 | 3 | 3 | 2 | 14.29 | 3.74E-05 | 0.02  |
| FAM81B    | 2 | 0 | 2 | 2 | 14.29 | 4.31E-05 | 0.022 |
| TTC5      | 2 | 0 | 2 | 1 | 7.14  | 4.47E-05 | 0.023 |
| ARID1B    | 0 | 4 | 4 | 4 | 28.57 | 5.43E-05 | 0.023 |
| MBTPS2    | 0 | 2 | 2 | 2 | 14.29 | 5.40E-05 | 0.023 |
| SPON2     | 2 | 0 | 2 | 2 | 14.29 | 5.00E-05 | 0.023 |
| SPRR2F    | 0 | 2 | 2 | 2 | 14.29 | 5.02E-05 | 0.023 |
| MORN2     | 0 | 2 | 2 | 2 | 14.29 | 5.38E-05 | 0.023 |
| HAND1     | 0 | 2 | 2 | 2 | 14.29 | 5.21E-05 | 0.023 |
| IGSF9B    | 1 | 2 | 3 | 3 | 21.43 | 4.72E-05 | 0.023 |
| WDR43     | 0 | 3 | 3 | 3 | 21.43 | 4.95E-05 | 0.023 |
| RETSAT    | 0 | 3 | 3 | 2 | 14.29 | 5.71E-05 | 0.023 |
| KRT37     | 2 | 0 | 2 | 2 | 14.29 | 6.36E-05 | 0.024 |
| CSN3      | 0 | 2 | 2 | 2 | 14.29 | 6.27E-05 | 0.024 |
| LCE6A     | 0 | 2 | 2 | 2 | 14.29 | 6.33E-05 | 0.024 |
| SPANXN1   | 0 | 2 | 2 | 2 | 14.29 | 6.71E-05 | 0.024 |
| FIBP      | 0 | 2 | 2 | 2 | 14.29 | 6.52E-05 | 0.024 |
| PNRC2     | 0 | 2 | 2 | 2 | 14.29 | 6.72E-05 | 0.024 |
| FAM227B   | 0 | 3 | 3 | 3 | 21.43 | 6.69E-05 | 0.024 |
| PTPN13    | 0 | 4 | 4 | 4 | 28.57 | 7.28E-05 | 0.025 |
| CELF1     | 2 | 0 | 2 | 2 | 14.29 | 7.34E-05 | 0.025 |
| SLCO1A2   | 0 | 2 | 2 | 2 | 14.29 | 7.57E-05 | 0.025 |

|           |   |   |   |   |       |             |       |
|-----------|---|---|---|---|-------|-------------|-------|
| NKX2-4    | 0 | 2 | 2 | 2 | 14.29 | 7.90E-05    | 0.026 |
| B3GNT7    | 0 | 2 | 2 | 2 | 14.29 | 8.30E-05    | 0.027 |
| APOLD1    | 0 | 2 | 2 | 2 | 14.29 | 8.45E-05    | 0.027 |
| KPTN      | 2 | 0 | 2 | 2 | 14.29 | 8.77E-05    | 0.027 |
| FADS6     | 0 | 2 | 2 | 2 | 14.29 | 8.90E-05    | 0.027 |
| YJFN3     | 0 | 2 | 2 | 2 | 14.29 | 8.66E-05    | 0.027 |
| KLRF1     | 0 | 2 | 2 | 2 | 14.29 | 9.06E-05    | 0.027 |
| TSC22D4   | 0 | 2 | 2 | 2 | 14.29 | 9.86E-05    | 0.029 |
| ZNF676    | 0 | 3 | 3 | 3 | 21.43 | 0.000102064 | 0.029 |
| TBC1D9    | 0 | 3 | 3 | 3 | 21.43 | 0.000107379 | 0.03  |
| TAF4B     | 0 | 2 | 2 | 2 | 14.29 | 0.000119167 | 0.03  |
| TRABD2A   | 0 | 2 | 2 | 2 | 14.29 | 0.000114394 | 0.03  |
| ITGB3BP   | 0 | 2 | 2 | 2 | 14.29 | 0.000116281 | 0.03  |
| C2orf74   | 0 | 2 | 2 | 2 | 14.29 | 0.000114453 | 0.03  |
| WNT16     | 0 | 2 | 2 | 2 | 14.29 | 0.00011815  | 0.03  |
| ANKRD20A4 | 0 | 3 | 3 | 3 | 21.43 | 0.000117434 | 0.03  |
| DYRK1A    | 0 | 2 | 2 | 2 | 14.29 | 0.000121245 | 0.03  |
| DEFB118   | 0 | 2 | 2 | 2 | 14.29 | 0.000122618 | 0.03  |
| BHLHE41   | 2 | 0 | 2 | 2 | 14.29 | 0.000127382 | 0.031 |
| FANCC     | 2 | 0 | 2 | 2 | 14.29 | 0.000131668 | 0.031 |
| LCN9      | 0 | 2 | 2 | 2 | 14.29 | 0.000130193 | 0.031 |
| GNA13     | 0 | 2 | 2 | 2 | 14.29 | 0.000132979 | 0.031 |
| EIF1AD    | 0 | 2 | 2 | 2 | 14.29 | 0.000139152 | 0.032 |
| PIWIL1    | 0 | 2 | 2 | 2 | 14.29 | 0.000154611 | 0.034 |
| ENTPD8    | 2 | 0 | 2 | 2 | 14.29 | 0.000153371 | 0.034 |
| EIF3M     | 0 | 2 | 2 | 2 | 14.29 | 0.00015356  | 0.034 |
| FOXD4     | 0 | 2 | 2 | 2 | 14.29 | 0.000156394 | 0.034 |
| RBMS1     | 0 | 2 | 2 | 2 | 14.29 | 0.000156867 | 0.034 |
| CNTNAP3B  | 0 | 3 | 3 | 2 | 14.29 | 0.000159983 | 0.034 |
| DUSP10    | 0 | 2 | 2 | 2 | 14.29 | 0.000168457 | 0.036 |
| CDC42EP2  | 0 | 2 | 2 | 2 | 14.29 | 0.000183254 | 0.037 |
| FAM189A1  | 0 | 2 | 2 | 2 | 14.29 | 0.000180867 | 0.037 |
| GNAT3     | 0 | 2 | 2 | 2 | 14.29 | 0.000183825 | 0.037 |
| SSTR4     | 0 | 2 | 2 | 2 | 14.29 | 0.000182287 | 0.037 |
| MYL2      | 0 | 2 | 2 | 2 | 14.29 | 0.000190567 | 0.038 |
| ADAM30    | 2 | 0 | 2 | 2 | 14.29 | 0.000203413 | 0.039 |
| KRTAP1-1  | 0 | 2 | 2 | 2 | 14.29 | 0.000205031 | 0.039 |
| PPP2R5D   | 0 | 2 | 2 | 2 | 14.29 | 0.00020066  | 0.039 |
| RTL1      | 1 | 2 | 3 | 3 | 21.43 | 0.000201809 | 0.039 |
| ANKRD30A  | 0 | 3 | 3 | 3 | 21.43 | 0.000205647 | 0.039 |
| CCDC157   | 2 | 0 | 2 | 2 | 14.29 | 0.000211009 | 0.039 |
| SEBOX     | 0 | 2 | 2 | 2 | 14.29 | 0.000212213 | 0.039 |
| PRAMEF4   | 0 | 2 | 2 | 2 | 14.29 | 0.000215178 | 0.039 |
| EYS       | 0 | 4 | 4 | 4 | 28.57 | 0.000214498 | 0.039 |
| CCDC53    | 0 | 2 | 2 | 2 | 14.29 | 0.000227426 | 0.04  |
| ZNF25     | 0 | 2 | 2 | 2 | 14.29 | 0.000226891 | 0.04  |
| CCDC105   | 0 | 2 | 2 | 2 | 14.29 | 0.000236955 | 0.041 |

|           |   |   |   |   |       |             |       |
|-----------|---|---|---|---|-------|-------------|-------|
| PRH2      | 0 | 2 | 2 | 2 | 14.29 | 0.000235786 | 0.041 |
| BPHL      | 0 | 2 | 2 | 2 | 14.29 | 0.000249462 | 0.043 |
| PHKB      | 0 | 2 | 2 | 2 | 14.29 | 0.000269054 | 0.044 |
| DCUN1D2   | 0 | 2 | 2 | 2 | 14.29 | 0.000270136 | 0.044 |
| UCMA      | 0 | 2 | 2 | 2 | 14.29 | 0.000270618 | 0.044 |
| THEG5     | 0 | 2 | 2 | 2 | 14.29 | 0.000261598 | 0.044 |
| EMCN      | 0 | 2 | 2 | 2 | 14.29 | 0.000265665 | 0.044 |
| TMEM150C  | 0 | 2 | 2 | 2 | 14.29 | 0.000279082 | 0.045 |
| SPRED3    | 0 | 2 | 2 | 2 | 14.29 | 0.000284806 | 0.045 |
| TMEM202   | 0 | 2 | 2 | 2 | 14.29 | 0.000289391 | 0.045 |
| ARHGAP15  | 0 | 2 | 2 | 2 | 14.29 | 0.000288743 | 0.045 |
| NTF4      | 0 | 2 | 2 | 2 | 14.29 | 0.000298452 | 0.046 |
| PSKH2     | 0 | 2 | 2 | 2 | 14.29 | 0.000294796 | 0.046 |
| SIRPD     | 0 | 2 | 2 | 2 | 14.29 | 0.000297286 | 0.046 |
| SPIN4     | 0 | 2 | 2 | 2 | 14.29 | 0.000301099 | 0.046 |
| DCAF12L1  | 0 | 2 | 2 | 2 | 14.29 | 0.000302503 | 0.046 |
| ASNA1     | 0 | 2 | 2 | 2 | 14.29 | 0.000307501 | 0.046 |
| ASXL3     | 0 | 3 | 3 | 3 | 21.43 | 0.000307308 | 0.046 |
| CHSY3     | 0 | 2 | 2 | 2 | 14.29 | 0.000311032 | 0.046 |
| GCC1      | 0 | 2 | 2 | 2 | 14.29 | 0.000325769 | 0.048 |
| ENTPD2    | 0 | 2 | 2 | 2 | 14.29 | 0.000330228 | 0.048 |
| IZUMO1    | 0 | 2 | 2 | 2 | 14.29 | 0.000347035 | 0.05  |
| SPATA17   | 0 | 2 | 2 | 2 | 14.29 | 0.000352117 | 0.05  |
| ALOXE3    | 2 | 0 | 2 | 2 | 14.29 | 0.000360303 | 0.05  |
| ACHE      | 0 | 2 | 2 | 2 | 14.29 | 0.000360459 | 0.05  |
| TMPRSS11E | 0 | 2 | 2 | 2 | 14.29 | 0.000364077 | 0.05  |
| TSPAN17   | 0 | 2 | 2 | 2 | 14.29 | 0.000370005 | 0.05  |
| CD40      | 0 | 2 | 2 | 2 | 14.29 | 0.000367982 | 0.05  |
| EDIL3     | 0 | 2 | 2 | 2 | 14.29 | 0.000372184 | 0.05  |
| TRIM10    | 0 | 2 | 2 | 2 | 14.29 | 0.000377832 | 0.051 |
| TACSTD2   | 0 | 2 | 2 | 2 | 14.29 | 0.000382951 | 0.051 |
| NR0B1     | 0 | 2 | 2 | 2 | 14.29 | 0.000388919 | 0.051 |
| SLC13A4   | 0 | 2 | 2 | 2 | 14.29 | 0.000390587 | 0.051 |
| FAT2      | 0 | 5 | 5 | 5 | 35.71 | 0.000402312 | 0.052 |
| HOXB4     | 0 | 2 | 2 | 2 | 14.29 | 0.000410997 | 0.053 |
| RAB3C     | 0 | 2 | 2 | 2 | 14.29 | 0.000416744 | 0.054 |
| RRBP1     | 2 | 0 | 2 | 2 | 14.29 | 0.000434876 | 0.055 |
| SUMF2     | 0 | 2 | 2 | 2 | 14.29 | 0.000438831 | 0.055 |
| TMEM221   | 0 | 2 | 2 | 2 | 14.29 | 0.000440556 | 0.055 |
| USP14     | 0 | 2 | 2 | 2 | 14.29 | 0.000435127 | 0.055 |
| TOM1L1    | 0 | 2 | 2 | 2 | 14.29 | 0.000467924 | 0.058 |
| FOXF2     | 0 | 2 | 2 | 2 | 14.29 | 0.000473232 | 0.059 |
| CBX6      | 0 | 2 | 2 | 2 | 14.29 | 0.00047731  | 0.059 |
| RASEF     | 0 | 2 | 2 | 2 | 14.29 | 0.000479411 | 0.059 |
| LIME1     | 0 | 2 | 2 | 2 | 14.29 | 0.000484785 | 0.059 |
| OLIG2     | 0 | 2 | 2 | 2 | 14.29 | 0.000486167 | 0.059 |
| POMC      | 0 | 2 | 2 | 2 | 14.29 | 0.000498573 | 0.06  |

|           |   |   |   |   |       |             |       |
|-----------|---|---|---|---|-------|-------------|-------|
| LRCH2     | 0 | 2 | 2 | 2 | 14.29 | 0.000501891 | 0.06  |
| NPHS2     | 0 | 2 | 2 | 2 | 14.29 | 0.000514701 | 0.061 |
| GKAP1     | 0 | 2 | 2 | 2 | 14.29 | 0.000518927 | 0.061 |
| SLC35F4   | 0 | 2 | 2 | 2 | 14.29 | 0.000523344 | 0.061 |
| ERCC6     | 2 | 0 | 2 | 2 | 14.29 | 0.000545376 | 0.062 |
| KIAA0196  | 2 | 0 | 2 | 2 | 14.29 | 0.000547905 | 0.062 |
| PATZ1     | 0 | 2 | 2 | 2 | 14.29 | 0.000550606 | 0.062 |
| ANAPC7    | 0 | 2 | 2 | 2 | 14.29 | 0.000548609 | 0.062 |
| SCAMP2    | 0 | 2 | 2 | 2 | 14.29 | 0.00057526  | 0.063 |
| BTN2A2    | 0 | 2 | 2 | 2 | 14.29 | 0.000572275 | 0.063 |
| KCTD9     | 0 | 2 | 2 | 2 | 14.29 | 0.000584582 | 0.063 |
| ITFG1     | 0 | 2 | 2 | 2 | 14.29 | 0.000568781 | 0.063 |
| GPR15     | 0 | 2 | 2 | 2 | 14.29 | 0.000568357 | 0.063 |
| TRIM58    | 0 | 2 | 2 | 2 | 14.29 | 0.000579473 | 0.063 |
| SGCZ      | 0 | 2 | 2 | 2 | 14.29 | 0.000581678 | 0.063 |
| TDRD3     | 0 | 2 | 2 | 2 | 14.29 | 0.000567356 | 0.063 |
| LPCAT1    | 0 | 2 | 2 | 2 | 14.29 | 0.000582255 | 0.063 |
| PCDHGA7   | 0 | 2 | 2 | 2 | 14.29 | 0.00056207  | 0.063 |
| JADE2     | 0 | 2 | 2 | 2 | 14.29 | 0.000588393 | 0.063 |
| NLRX1     | 2 | 0 | 2 | 2 | 14.29 | 0.000591886 | 0.063 |
| ITLN1     | 0 | 2 | 2 | 2 | 14.29 | 0.000595424 | 0.063 |
| TMEM191C  | 0 | 2 | 2 | 2 | 14.29 | 0.000612229 | 0.064 |
| LOXL1     | 0 | 2 | 2 | 2 | 14.29 | 0.000618492 | 0.064 |
| NUP37     | 0 | 2 | 2 | 2 | 14.29 | 0.000622142 | 0.064 |
| WRAP73    | 0 | 2 | 2 | 2 | 14.29 | 0.000620133 | 0.064 |
| APLP1     | 0 | 2 | 2 | 2 | 14.29 | 0.000610795 | 0.064 |
| ZSWIM2    | 0 | 2 | 2 | 2 | 14.29 | 0.000631775 | 0.064 |
| TRIM43    | 0 | 2 | 2 | 2 | 14.29 | 0.000637855 | 0.065 |
| SNX30     | 0 | 2 | 2 | 2 | 14.29 | 0.000659993 | 0.066 |
| CYBA      | 0 | 2 | 2 | 2 | 14.29 | 0.000662101 | 0.066 |
| SLFN12L   | 0 | 2 | 2 | 2 | 14.29 | 0.000659491 | 0.066 |
| RHAG      | 0 | 2 | 2 | 2 | 14.29 | 0.000668387 | 0.066 |
| KIAA1147  | 0 | 2 | 2 | 2 | 14.29 | 0.000683226 | 0.067 |
| PRDX1     | 0 | 2 | 2 | 2 | 14.29 | 0.000680461 | 0.067 |
| GNPTAB    | 2 | 0 | 2 | 2 | 14.29 | 0.000734518 | 0.068 |
| BICD2     | 0 | 2 | 2 | 2 | 14.29 | 0.000712557 | 0.068 |
| OTX2      | 0 | 2 | 2 | 2 | 14.29 | 0.00073621  | 0.068 |
| NOTO      | 0 | 2 | 2 | 2 | 14.29 | 0.000693955 | 0.068 |
| ASB11     | 0 | 2 | 2 | 2 | 14.29 | 0.000704046 | 0.068 |
| CPA5      | 0 | 2 | 2 | 2 | 14.29 | 0.000707585 | 0.068 |
| DPY19L2   | 0 | 2 | 2 | 2 | 14.29 | 0.000720027 | 0.068 |
| PLBD1     | 0 | 2 | 2 | 2 | 14.29 | 0.000734382 | 0.068 |
| POLR2B    | 0 | 2 | 2 | 2 | 14.29 | 0.000709032 | 0.068 |
| PABPC4L   | 0 | 2 | 2 | 2 | 14.29 | 0.000735588 | 0.068 |
| SRRM4     | 0 | 2 | 2 | 2 | 14.29 | 0.00072417  | 0.068 |
| PLEKHH2   | 0 | 5 | 5 | 3 | 21.43 | 0.000715322 | 0.068 |
| KRTAP10-2 | 0 | 2 | 2 | 2 | 14.29 | 0.000698752 | 0.068 |

|         |   |   |   |   |       |             |       |
|---------|---|---|---|---|-------|-------------|-------|
| ZNF468  | 1 | 1 | 2 | 2 | 14.29 | 0.000695283 | 0.068 |
| ROR2    | 0 | 2 | 2 | 2 | 14.29 | 0.00075095  | 0.069 |
| ACTB    | 0 | 2 | 2 | 2 | 14.29 | 0.000762798 | 0.069 |
| MUC4    | 0 | 5 | 5 | 2 | 14.29 | 0.000761952 | 0.069 |
| STX3    | 0 | 2 | 2 | 2 | 14.29 | 0.000769512 | 0.069 |
| MREG    | 0 | 2 | 2 | 2 | 14.29 | 0.000776168 | 0.07  |
| P2RX4   | 0 | 2 | 2 | 2 | 14.29 | 0.000800991 | 0.071 |
| CSMD3   | 0 | 4 | 4 | 4 | 28.57 | 0.000800089 | 0.071 |
| GSE1    | 2 | 0 | 2 | 2 | 14.29 | 0.000817261 | 0.072 |
| SEC23A  | 0 | 2 | 2 | 2 | 14.29 | 0.000817582 | 0.072 |
| TMEM8A  | 0 | 2 | 2 | 2 | 14.29 | 0.000811452 | 0.072 |
| ATP1B2  | 0 | 2 | 2 | 2 | 14.29 | 0.000833975 | 0.073 |
| SLC50A1 | 0 | 2 | 2 | 2 | 14.29 | 0.000836647 | 0.073 |
| ZNF420  | 0 | 2 | 2 | 2 | 14.29 | 0.00084127  | 0.073 |
| CDCA7   | 0 | 2 | 2 | 2 | 14.29 | 0.000859627 | 0.074 |
| GALE    | 0 | 2 | 2 | 2 | 14.29 | 0.000875642 | 0.075 |
| CR2     | 0 | 2 | 2 | 2 | 14.29 | 0.000890027 | 0.076 |
| APOA5   | 0 | 2 | 2 | 2 | 14.29 | 0.000921471 | 0.078 |
| PRKCZ   | 0 | 2 | 2 | 2 | 14.29 | 0.000957771 | 0.081 |
| PCDHGA6 | 0 | 2 | 2 | 2 | 14.29 | 0.000954462 | 0.081 |
| SOS1    | 0 | 2 | 2 | 2 | 14.29 | 0.00098324  | 0.082 |
| IFIT2   | 0 | 2 | 2 | 2 | 14.29 | 0.000989334 | 0.082 |
| VRTN    | 0 | 2 | 2 | 2 | 14.29 | 0.000990352 | 0.082 |
| VCAN    | 0 | 3 | 3 | 3 | 21.43 | 0.00098821  | 0.082 |
| OTOL1   | 0 | 2 | 2 | 2 | 14.29 | 0.000995771 | 0.082 |
| CDKN2A  | 0 | 2 | 2 | 2 | 14.29 | 0.001008447 | 0.083 |
| GLCE    | 0 | 2 | 2 | 2 | 14.29 | 0.001042228 | 0.085 |
| RTTN    | 0 | 3 | 3 | 3 | 21.43 | 0.001041115 | 0.085 |
| ALPK1   | 0 | 2 | 2 | 2 | 14.29 | 0.001047775 | 0.085 |
| ZIM2    | 0 | 2 | 2 | 2 | 14.29 | 0.001078656 | 0.087 |
| MEGF9   | 0 | 2 | 2 | 2 | 14.29 | 0.001102219 | 0.088 |
| ZNF326  | 0 | 2 | 2 | 2 | 14.29 | 0.001106143 | 0.088 |
| TLK1    | 0 | 2 | 2 | 2 | 14.29 | 0.00112286  | 0.089 |
| ADSS    | 0 | 2 | 2 | 2 | 14.29 | 0.001124834 | 0.089 |
| SLC18B1 | 0 | 2 | 2 | 2 | 14.29 | 0.001127092 | 0.089 |
| WDR92   | 0 | 2 | 2 | 2 | 14.29 | 0.001154585 | 0.09  |
| SCNN1G  | 0 | 2 | 2 | 2 | 14.29 | 0.001156475 | 0.09  |
| MST1L   | 0 | 2 | 2 | 2 | 14.29 | 0.00114868  | 0.09  |
| TEF     | 0 | 2 | 2 | 2 | 14.29 | 0.001190603 | 0.092 |
| ZNF79   | 0 | 2 | 2 | 2 | 14.29 | 0.001194198 | 0.092 |
| KLHL10  | 0 | 2 | 2 | 2 | 14.29 | 0.001195193 | 0.092 |
| VEPH1   | 0 | 2 | 2 | 2 | 14.29 | 0.001210041 | 0.092 |
| ZFP30   | 0 | 2 | 2 | 2 | 14.29 | 0.001213081 | 0.092 |
| ACVR2A  | 0 | 2 | 2 | 2 | 14.29 | 0.001206077 | 0.092 |
| ITGA3   | 0 | 2 | 2 | 2 | 14.29 | 0.001238235 | 0.093 |
| WDR44   | 0 | 2 | 2 | 2 | 14.29 | 0.001237092 | 0.093 |
| BRINP2  | 0 | 2 | 2 | 2 | 14.29 | 0.001244125 | 0.093 |

|          |   |   |   |   |       |             |       |
|----------|---|---|---|---|-------|-------------|-------|
| C8orf34  | 0 | 2 | 2 | 2 | 14.29 | 0.001268928 | 0.095 |
| CAMSAP3  | 0 | 2 | 2 | 2 | 14.29 | 0.001307677 | 0.096 |
| FAM160A1 | 0 | 2 | 2 | 2 | 14.29 | 0.001305693 | 0.096 |
| DGAT2    | 0 | 2 | 2 | 2 | 14.29 | 0.001296696 | 0.096 |
| EGFLAM   | 0 | 2 | 2 | 2 | 14.29 | 0.001294925 | 0.096 |
| HRCT1    | 1 | 0 | 1 | 1 | 7.14  | 0.001305143 | 0.096 |
| FBXO11   | 0 | 2 | 2 | 2 | 14.29 | 0.001324474 | 0.097 |
| HDAC7    | 0 | 2 | 2 | 2 | 14.29 | 0.001345368 | 0.098 |
| TENM1    | 0 | 3 | 3 | 3 | 21.43 | 0.001344464 | 0.098 |
| MYO1A    | 0 | 2 | 2 | 2 | 14.29 | 0.001379831 | 0.099 |
| TTC13    | 0 | 2 | 2 | 2 | 14.29 | 0.001376382 | 0.099 |
| SPAG6    | 0 | 2 | 2 | 2 | 14.29 | 0.001377826 | 0.099 |
| ZNF263   | 0 | 2 | 2 | 2 | 14.29 | 0.001377445 | 0.099 |
| AMIGO2   | 0 | 2 | 2 | 2 | 14.29 | 0.001408198 | 0.1   |
| RPAIN    | 0 | 2 | 2 | 2 | 14.29 | 0.001410384 | 0.1   |
| DACT1    | 0 | 2 | 2 | 2 | 14.29 | 0.001428369 | 0.101 |
| POF1B    | 0 | 2 | 2 | 2 | 14.29 | 0.001465931 | 0.103 |
| KIF23    | 0 | 2 | 2 | 2 | 14.29 | 0.001475573 | 0.104 |
| AQR      | 0 | 2 | 2 | 2 | 14.29 | 0.001493906 | 0.104 |
| FRMD6    | 0 | 2 | 2 | 2 | 14.29 | 0.001491786 | 0.104 |
| FANCL    | 0 | 2 | 2 | 2 | 14.29 | 0.001497522 | 0.104 |
| CYP39A1  | 0 | 2 | 2 | 2 | 14.29 | 0.00150304  | 0.104 |
| PPP1R16B | 0 | 2 | 2 | 2 | 14.29 | 0.001600674 | 0.11  |
| FAM73B   | 0 | 2 | 2 | 2 | 14.29 | 0.001632055 | 0.11  |
| SLC7A7   | 0 | 2 | 2 | 2 | 14.29 | 0.001642959 | 0.11  |
| BAP1     | 0 | 2 | 2 | 2 | 14.29 | 0.001616456 | 0.11  |
| HSPA5    | 0 | 2 | 2 | 2 | 14.29 | 0.001631156 | 0.11  |
| POFUT2   | 0 | 2 | 2 | 2 | 14.29 | 0.001603019 | 0.11  |
| SOBP     | 0 | 2 | 2 | 2 | 14.29 | 0.001640763 | 0.11  |
| SH2D7    | 0 | 2 | 2 | 2 | 14.29 | 0.001611836 | 0.11  |
| SEC14L2  | 0 | 2 | 2 | 2 | 14.29 | 0.001634566 | 0.11  |
| TP53BP1  | 2 | 0 | 2 | 2 | 14.29 | 0.00166515  | 0.111 |
| ESPL1    | 0 | 3 | 3 | 3 | 21.43 | 0.001671114 | 0.111 |
| FOXP4    | 0 | 2 | 2 | 2 | 14.29 | 0.001683886 | 0.112 |
| RBM46    | 0 | 2 | 2 | 2 | 14.29 | 0.001691468 | 0.112 |
| PDIA5    | 0 | 2 | 2 | 2 | 14.29 | 0.001757638 | 0.116 |
| SLC19A3  | 0 | 2 | 2 | 2 | 14.29 | 0.00176972  | 0.116 |
| XYLT1    | 0 | 2 | 2 | 2 | 14.29 | 0.001769511 | 0.116 |
| ABCA13   | 0 | 4 | 4 | 4 | 28.57 | 0.001800661 | 0.117 |
| SLC7A11  | 0 | 2 | 2 | 2 | 14.29 | 0.00182494  | 0.118 |
| PCDHGA2  | 0 | 2 | 2 | 2 | 14.29 | 0.001826002 | 0.118 |
| ITGA4    | 0 | 2 | 2 | 2 | 14.29 | 0.001836816 | 0.119 |
| LRP2     | 0 | 4 | 4 | 2 | 14.29 | 0.001848666 | 0.119 |
| DGCR8    | 0 | 2 | 2 | 2 | 14.29 | 0.00186471  | 0.12  |
| ZNF573   | 0 | 2 | 2 | 2 | 14.29 | 0.001871943 | 0.12  |
| SYT10    | 0 | 2 | 2 | 2 | 14.29 | 0.00188681  | 0.12  |
| ATP13A3  | 0 | 2 | 2 | 2 | 14.29 | 0.001884501 | 0.12  |



|          |   |   |   |   |       |             |       |
|----------|---|---|---|---|-------|-------------|-------|
| PLA2G4E  | 0 | 2 | 2 | 2 | 14.29 | 0.001912645 | 0.121 |
| RNF225   | 0 | 2 | 2 | 2 | 14.29 | 0.001912667 | 0.121 |
| FZD9     | 0 | 2 | 2 | 2 | 14.29 | 0.001943085 | 0.121 |
| EPHB3    | 0 | 2 | 2 | 2 | 14.29 | 0.00194074  | 0.121 |
| BRD7     | 0 | 2 | 2 | 1 | 7.14  | 0.001942263 | 0.121 |
| PTPRU    | 0 | 2 | 2 | 2 | 14.29 | 0.001989522 | 0.123 |
| VWA3B    | 0 | 2 | 2 | 2 | 14.29 | 0.001986824 | 0.123 |
| MAGEC3   | 0 | 2 | 2 | 2 | 14.29 | 0.002053418 | 0.127 |
| LRRIQ1   | 0 | 2 | 2 | 2 | 14.29 | 0.002065262 | 0.127 |
| RELN     | 0 | 3 | 3 | 3 | 21.43 | 0.00209337  | 0.129 |
| SCMH1    | 0 | 2 | 2 | 2 | 14.29 | 0.002113936 | 0.129 |
| F2       | 0 | 2 | 2 | 2 | 14.29 | 0.002149085 | 0.131 |
| PRPF40B  | 0 | 2 | 2 | 2 | 14.29 | 0.002187523 | 0.133 |
| SLK      | 0 | 2 | 2 | 2 | 14.29 | 0.002198905 | 0.133 |
| TGFBRAP1 | 0 | 2 | 2 | 2 | 14.29 | 0.002221018 | 0.134 |
| ZXDB     | 0 | 2 | 2 | 2 | 14.29 | 0.002286671 | 0.138 |
| RELA     | 0 | 2 | 2 | 2 | 14.29 | 0.002301261 | 0.138 |
| SCN8A    | 2 | 0 | 2 | 2 | 14.29 | 0.002349316 | 0.139 |
| DDX43    | 0 | 2 | 2 | 2 | 14.29 | 0.002336293 | 0.139 |
| ANKS3    | 0 | 2 | 2 | 2 | 14.29 | 0.002345418 | 0.139 |
| PARN     | 0 | 2 | 2 | 2 | 14.29 | 0.002349705 | 0.139 |
| FYB      | 0 | 2 | 2 | 2 | 14.29 | 0.002345363 | 0.139 |
| ANO4     | 0 | 2 | 2 | 2 | 14.29 | 0.002321688 | 0.139 |
| EYA4     | 0 | 2 | 2 | 2 | 14.29 | 0.002400124 | 0.141 |
| PIK3R1   | 0 | 2 | 2 | 2 | 14.29 | 0.002415518 | 0.142 |
| UNC45B   | 0 | 2 | 2 | 2 | 14.29 | 0.002478806 | 0.145 |
| RASGRP1  | 0 | 2 | 2 | 2 | 14.29 | 0.00250559  | 0.146 |
| ABCA8    | 0 | 2 | 2 | 2 | 14.29 | 0.002540427 | 0.148 |
| CFAP61   | 0 | 2 | 2 | 2 | 14.29 | 0.002577226 | 0.149 |
| LRRC10B  | 0 | 2 | 2 | 2 | 14.29 | 0.002577874 | 0.149 |
| METTL4   | 0 | 1 | 1 | 1 | 7.14  | 0.002622853 | 0.151 |
| AASS     | 0 | 2 | 2 | 2 | 14.29 | 0.002666604 | 0.153 |
| SDAD1    | 0 | 2 | 2 | 2 | 14.29 | 0.002681181 | 0.153 |
| PCDHB13  | 0 | 2 | 2 | 2 | 14.29 | 0.002690603 | 0.153 |
| RGS9     | 0 | 2 | 2 | 2 | 14.29 | 0.002695981 | 0.153 |
| DMGDH    | 0 | 2 | 2 | 2 | 14.29 | 0.0027041   | 0.153 |
| SPTAN1   | 0 | 2 | 2 | 2 | 14.29 | 0.002769202 | 0.157 |
| INTS10   | 0 | 2 | 2 | 2 | 14.29 | 0.002799727 | 0.158 |
| CAPN9    | 0 | 2 | 2 | 2 | 14.29 | 0.002833958 | 0.159 |
| ZNF714   | 0 | 2 | 2 | 2 | 14.29 | 0.002840325 | 0.159 |
| FAM21C   | 0 | 2 | 2 | 2 | 14.29 | 0.002880708 | 0.161 |
| ADAMTS14 | 0 | 2 | 2 | 2 | 14.29 | 0.002910148 | 0.162 |
| ITGB8    | 0 | 2 | 2 | 2 | 14.29 | 0.002924766 | 0.162 |
| OPA1     | 0 | 2 | 2 | 2 | 14.29 | 0.002938211 | 0.163 |
| KIAA0319 | 0 | 2 | 2 | 2 | 14.29 | 0.002966901 | 0.164 |
| TAS1R2   | 0 | 2 | 2 | 2 | 14.29 | 0.003030844 | 0.167 |
| MICALL2  | 0 | 2 | 2 | 2 | 14.29 | 0.003219064 | 0.177 |

|         |   |   |   |   |       |             |       |
|---------|---|---|---|---|-------|-------------|-------|
| SEC61G  | 0 | 1 | 1 | 1 | 7.14  | 0.003235677 | 0.177 |
| ARMC5   | 0 | 2 | 2 | 2 | 14.29 | 0.003273929 | 0.179 |
| PPP1R35 | 1 | 0 | 1 | 1 | 7.14  | 0.003320149 | 0.181 |
| SLC24A3 | 0 | 2 | 2 | 2 | 14.29 | 0.003335032 | 0.181 |
| MUC2    | 0 | 3 | 3 | 3 | 21.43 | 0.003351305 | 0.181 |
| GAK     | 0 | 2 | 2 | 2 | 14.29 | 0.003406865 | 0.184 |
| CARD11  | 0 | 2 | 2 | 2 | 14.29 | 0.003480545 | 0.187 |
| HGFAC   | 0 | 2 | 2 | 2 | 14.29 | 0.003517695 | 0.189 |
| IL17RE  | 0 | 2 | 2 | 2 | 14.29 | 0.00355156  | 0.189 |
| DPP4    | 0 | 2 | 2 | 2 | 14.29 | 0.003567862 | 0.189 |
| CBLB    | 0 | 2 | 2 | 2 | 14.29 | 0.003535447 | 0.189 |
| KLHL13  | 0 | 2 | 2 | 2 | 14.29 | 0.003560664 | 0.189 |
| C9orf84 | 0 | 2 | 2 | 2 | 14.29 | 0.003545911 | 0.189 |
| NFYB    | 0 | 1 | 1 | 1 | 7.14  | 0.003588656 | 0.189 |
| ANKS6   | 0 | 2 | 2 | 2 | 14.29 | 0.00366052  | 0.192 |
| FBLN2   | 0 | 2 | 2 | 2 | 14.29 | 0.003661616 | 0.192 |
| CPT1C   | 0 | 2 | 2 | 2 | 14.29 | 0.003680029 | 0.193 |
| VPS41   | 0 | 2 | 2 | 2 | 14.29 | 0.003729687 | 0.195 |
| CTIF    | 0 | 2 | 2 | 2 | 14.29 | 0.003741908 | 0.195 |
| SYPL2   | 1 | 0 | 1 | 1 | 7.14  | 0.003819472 | 0.198 |

**Supplementary Table 6:** Distribution of predisposing genes for 7 H-ChC patients

| Patient | Hugo_Symbol | Chromosome | Position  | Ref_allele                                     | Alt_allele                                    | Variant_Classification | Variant_Type |
|---------|-------------|------------|-----------|------------------------------------------------|-----------------------------------------------|------------------------|--------------|
| P1      | PTPRC       | 1          | 198711122 | A                                              | G                                             | Missense_Mutation      | SNP          |
|         | PDE4DIP     | 1          | 145075683 | C                                              | T                                             | Nonsense_Mutation      | SNP          |
|         | NOTCH2      | 1          | 120512245 | C                                              | T                                             | Missense_Mutation      | SNP          |
|         | AFF3        | 2          | 100210334 | CGGCTGAGG                                      | CGG                                           | In_Frame_Del           | DEL          |
|         | PBRM1       | 3          | 52584431  | TCT                                            | TCTCCT                                        | Splice_Site            | INS          |
|         | KDR         | 4          | 55972974  | T                                              | A                                             | Missense_Mutation      | SNP          |
|         | FGFR3       | 4          | 1803361   | G                                              | T                                             | Missense_Mutation      | SNP          |
|         | RANBP17     | 5          | 170336704 | G                                              | A                                             | Missense_Mutation      | SNP          |
|         | PDGFRB      | 5          | 149497177 | T                                              | C                                             | Splice_Site            | SNP          |
|         | FGFR4       | 5          | 176520243 | G                                              | A                                             | Missense_Mutation      | SNP          |
|         | MAP3K1      | 5          | 56177848  | TCAACAACAA<br>CAACAACAAC<br>ACAACA             | TCAACAACAA<br>CAACAACAAC<br>AACA              | In_Frame_Del           | DEL          |
|         | CCND3       | 6          | 41903782  | A                                              | C                                             | Missense_Mutation      | SNP          |
|         | DAXX        | 6          | 33287880  | GCCTCCTCCTC                                    | GCCTCCTC                                      | In_Frame_Del           | DEL          |
|         | CREB3L2     | 7          | 137612913 | CTGGTGGT                                       | CTGGT                                         | In_Frame_Del           | DEL          |
|         | AKAP9       | 7          | 91652178  | AAAC                                           | AAACAAC                                       | In_Frame_Ins           | INS          |
|         | POT1        | 7          | 124475296 | TAAACAAAAC<br>AAAACAAAAC<br>AAAACAAAAC<br>AAAA | TAAACAAAAC<br>AAAACAAAAC<br>AAAACAAAAC<br>AAA | Splice_Site            | INS          |
|         | RECQL4      | 8          | 145737816 | C                                              | T                                             | Missense_Mutation      | SNP          |
| PTCH1   | 9           | 98209594   | G         | A                                              | Missense_Mutation                             | SNP                    |              |
| NOTCH1  | 9           | 139391403  | C         | T                                              | Missense_Mutation                             | SNP                    |              |

|    |          |    |           |                                                               |                                                                                      |                   |     |
|----|----------|----|-----------|---------------------------------------------------------------|--------------------------------------------------------------------------------------|-------------------|-----|
|    | CCDC6    | 10 | 61552692  | G                                                             | T                                                                                    | Missense_Mutation | SNP |
|    | CREB3L1  | 11 | 46342259  | AGG                                                           | AGGG                                                                                 | Frame_Shift_Ins   | INS |
|    | MAML2    | 11 | 95825374  | TTGCTGCTGCT<br>GCTGCTGCTGC<br>TGCTGCTGCTG<br>CTGCTGCTG        | TTGCTGCTGCT<br>GCTGCTGCTGC<br>TGCTGCTGCTG                                            | In_Frame_Del      | DEL |
|    | ZNF384   | 12 | 6777069   | TTGCTGCTGCT<br>GCTGCTGCTGC<br>TGCTGCTGCTG<br>CTGCTGCTGCT<br>G | TTGCTGCTGCT<br>GCTGCTGCTGC<br>TGCTGCTGCTG<br>CTGCTGCTG                               | In_Frame_Del      | DEL |
|    | CIITA    | 16 | 10989219  | C                                                             | G                                                                                    | Missense_Mutation | SNP |
|    | SETBP1   | 18 | 42456670  | C                                                             | CTCTT                                                                                | Frame_Shift_Ins   | INS |
|    | ASXL1    | 20 | 31019136  | G                                                             | A                                                                                    | Missense_Mutation | SNP |
|    | TMPRSS2  | 21 | 42852497  | C                                                             | T                                                                                    | Missense_Mutation | SNP |
|    | MN1      | 22 | 28194933  | TTGCTGCTGCT<br>GCTGCTGCTGC<br>TGCTGCTG                        | TTGCTGCTGCT<br>GCTGCTGCTGC<br>TGCTGCTGCTG                                            | In_Frame_Ins      | INS |
|    | MN1      | 22 | 28194894  | CTGCTGTTGCT<br>GTTGCTGTTGC<br>TG                              | CTGCTGTTGCT<br>GTTGCTG                                                               | In_Frame_Del      | DEL |
|    | CDC42EP1 | 22 | 37964408  | CCAGCGCCTG<br>CTGCAAACCC<br>CTCAGC                            | CCAGC                                                                                | In_Frame_Del      | DEL |
|    | CLTCL1   | 22 | 19189003  | AC                                                            | ACC                                                                                  | Splice_Site       | INS |
| P2 | NTRK1    | 1  | 156814027 | G                                                             | A                                                                                    | Missense_Mutation | SNP |
|    | ALK      | 2  | 29917793  | C                                                             | T                                                                                    | Missense_Mutation | SNP |
|    | PBRM1    | 3  | 52584431  | TCT                                                           | TCTCCT                                                                               | Splice_Site       | INS |
|    | WWTR1    | 3  | 149238595 | C                                                             | CTTAA                                                                                | Nonsense_Mutation | INS |
|    | SLC34A2  | 4  | 25675989  | G                                                             | A                                                                                    | Missense_Mutation | SNP |
|    | KDR      | 4  | 55972974  | T                                                             | A                                                                                    | Missense_Mutation | SNP |
|    | KDR      | 4  | 55979558  | C                                                             | T                                                                                    | Missense_Mutation | SNP |
|    | FGFR4    | 5  | 176520243 | G                                                             | A                                                                                    | Missense_Mutation | SNP |
|    | MAP3K1   | 5  | 56177848  | TCAACAACAA<br>CAACAACAAC<br>AACAACA                           | TCAACAACAA<br>CAACAACAAC<br>AACA                                                     | In_Frame_Del      | DEL |
|    | ROS1     | 6  | 117650532 | C                                                             | G                                                                                    | Missense_Mutation | SNP |
|    | CCND3    | 6  | 41903782  | A                                                             | C                                                                                    | Missense_Mutation | SNP |
|    | CREB3L2  | 7  | 137612913 | CTGGTGGT                                                      | CTGGT                                                                                | In_Frame_Del      | DEL |
|    | POT1     | 7  | 124475296 | TAAACAAAAC<br>AAAACAAAAC<br>AAAACAAAAC<br>AAAA                | TAAACAAAAC<br>AAAACAAAAC<br>AAAACAAAAC<br>AAAACAAAA                                  | Splice_Site       | INS |
|    | RECQL4   | 8  | 145737816 | C                                                             | T                                                                                    | Missense_Mutation | SNP |
|    | RECQL4   | 8  | 145738767 | CGG                                                           | CG                                                                                   | Frame_Shift_Del   | DEL |
|    | PCM1     | 8  | 17827260  | AC                                                            | ACC                                                                                  | Splice_Site       | INS |
|    | PTCH1    | 9  | 98209594  | G                                                             | A                                                                                    | Missense_Mutation | SNP |
|    | MLLT3    | 9  | 20414340  | GCTACT                                                        | GCT                                                                                  | In_Frame_Del      | DEL |
|    | RET      | 10 | 43600607  | C                                                             | A                                                                                    | Missense_Mutation | SNP |
|    | KAT6B    | 10 | 76781905  | GGAAGAAGAA<br>GAAGAAGAAG<br>AAGAA                             | GGAAGAAGAA<br>GAAGAAGAAG<br>AA                                                       | In_Frame_Del      | DEL |
|    | MAML2    | 11 | 95825374  | TTGCTGCTGCT<br>GCTGCTGCTGC<br>TGCTGCTGCTG<br>CTGCTGCTG        | TTGCTGCTGCT<br>GCTGCTGCTGC<br>TGCTGCTGCTG<br>,TTGCTGCTGC<br>TGCTGCTGCTG<br>CTGCTGCTG | In_Frame_Del      | INS |
|    | CREB3L1  | 11 | 46342259  | AGG                                                           | AGGG                                                                                 | Frame_Shift_Ins   | INS |

|        |         |          |           |                                                               |                                                        |                   |     |
|--------|---------|----------|-----------|---------------------------------------------------------------|--------------------------------------------------------|-------------------|-----|
|        | ALDH2   | 12       | 112241766 | G                                                             | A                                                      | Missense_Mutation | SNP |
|        | ZNF384  | 12       | 6777069   | TTGCTGCTGCT<br>GCTGCTGCTGC<br>TGCTGCTGCTG<br>CTGCTGCTGCT<br>G | TTGCTGCTGCT<br>GCTGCTGCTGC<br>TGCTGCTGCTG<br>CTGCTGCTG | In_Frame_Del      | DEL |
|        | GOLGA5  | 14       | 93276667  | T                                                             | C                                                      | Missense_Mutation | SNP |
|        | NTRK3   | 15       | 88576178  | C                                                             | T                                                      | Missense_Mutation | SNP |
|        | CIITA   | 16       | 10989219  | C                                                             | G                                                      | Missense_Mutation | SNP |
|        | BRIP1   | 17       | 59820495  | T                                                             | C                                                      | Missense_Mutation | SNP |
|        | SETBP1  | 18       | 42456670  | C                                                             | CTCTT                                                  | Frame_Shift_Ins   | INS |
|        | MAP2K2  | 19       | 4099225   | G                                                             | A                                                      | Missense_Mutation | SNP |
|        | CLTCL1  | 22       | 19189003  | AC                                                            | ACC                                                    | Splice_Site       | INS |
|        | GATA1   | X        | 48652565  | C                                                             | A                                                      | Missense_Mutation | SNP |
| P3     | ETV5    | 3        | 185783742 | G                                                             | A                                                      | Missense_Mutation | SNP |
|        | WWTR1   | 3        | 149238595 | C                                                             | CTTAA                                                  | Nonsense_Mutation | INS |
|        | KDR     | 4        | 55979558  | C                                                             | T                                                      | Missense_Mutation | SNP |
|        | KDR     | 4        | 55972974  | T                                                             | A                                                      | Missense_Mutation | SNP |
|        | MAP3K1  | 5        | 56177848  | TCAACAACAA<br>CAACAACAAC<br>AACAACA                           | TCAACAACAA<br>CAACAACAAC<br>AACA                       | In_Frame_Del      | DEL |
|        | CCND3   | 6        | 41903782  | A                                                             | C                                                      | Missense_Mutation | SNP |
|        | AKAP9   | 7        | 91714216  | A                                                             | G                                                      | Missense_Mutation | SNP |
|        | CREB3L2 | 7        | 137612913 | CTGGTGGT                                                      | CTGGT                                                  | In_Frame_Del      | DEL |
|        | POT1    | 7        | 124475296 | TAAACAAAAC<br>AAAACAAAAC<br>AAAACAAAAC<br>AAAA                | TAAACAAAAC<br>AAAACAAAAC<br>AAAACAAAAC<br>AAAACAAAAC   | Splice_Site       | INS |
|        | AKAP9   | 7        | 91652178  | AAAC                                                          | AAACAAC                                                | In_Frame_Ins      | INS |
|        | PTCH1   | 9        | 98209594  | G                                                             | A                                                      | Missense_Mutation | SNP |
|        | CCDC6   | 10       | 61552692  | G                                                             | T                                                      | Missense_Mutation | SNP |
|        | KAT6B   | 10       | 76781905  | GGAAGAAGAA<br>GAAGAAGAAG<br>AAGAA                             | GGAAGAAGAA<br>GAAGAAGAAG<br>AA                         | In_Frame_Del      | DEL |
|        | NUP98   | 11       | 3726498   | G                                                             | A                                                      | Missense_Mutation | SNP |
|        | KMT2A   | 11       | 118307445 | G                                                             | A                                                      | Missense_Mutation | SNP |
|        | ATM     | 11       | 108192078 | C                                                             | T                                                      | Missense_Mutation | SNP |
|        | CREB3L1 | 11       | 46342259  | AGG                                                           | AGGG                                                   | Frame_Shift_Ins   | INS |
|        | MAML2   | 11       | 95825374  | TTGCTGCTGCT<br>GCTGCTGCTGC<br>TGCTGCTGCTG<br>CTGCTGCTG        | TTGCTGCTGCT<br>GCTGCTGCTGC<br>TGCTGCTGCTG              | In_Frame_Del      | DEL |
|        | KMT2D   | 12       | 49426753  | AGTTGCTGTTG<br>CTGTTGC                                        | AGTTGCTGTTG<br>C                                       | In_Frame_Del      | DEL |
|        | ZNF384  | 12       | 6777069   | TTGCTGCTGCT<br>GCTGCTGCTGC<br>TGCTGCTGCTG<br>CTGCTGCTGCT<br>G | TTGCTGCTGCT<br>GCTGCTGCTGC<br>TGCTGCTGCTG<br>CTGCTGCTG | In_Frame_Del      | DEL |
| SETBP1 | 18      | 42456670 | CA        | CTCTTA                                                        | Frame_Shift_Ins                                        | INS               |     |
| CLTCL1 | 22      | 19189003 | AC        | ACC                                                           | Splice_Site                                            | INS               |     |
| P4     | RANBP2  | 2        | 109388225 | C                                                             | A                                                      | Missense_Mutation | SNP |
|        | MECOM   | 3        | 168861569 | C                                                             | T                                                      | Missense_Mutation | SNP |
|        | PBRM1   | 3        | 52584431  | TCT                                                           | TCTCCT                                                 | Splice_Site       | INS |
|        | KDR     | 4        | 55972974  | T                                                             | A                                                      | Missense_Mutation | SNP |
|        | KDR     | 4        | 55979558  | C                                                             | T                                                      | Missense_Mutation | SNP |

|    |         |    |           |                                                               |                                                        |                   |     |
|----|---------|----|-----------|---------------------------------------------------------------|--------------------------------------------------------|-------------------|-----|
|    | PDGFRA  | 4  | 55151537  | G                                                             | C                                                      | Splice_Site       | SNP |
|    | PWWP2A  | 5  | 159546170 | CCGGCGGCGG<br>CGG                                             | CCGGCGGCGG<br>CGGCGGCGG                                | In_Frame_Ins      | INS |
|    | CCND3   | 6  | 41903782  | A                                                             | C                                                      | Missense_Mutation | SNP |
|    | ELN     | 7  | 73466166  | G                                                             | A                                                      | Missense_Mutation | SNP |
|    | CREB3L2 | 7  | 137612913 | CTGGTGGT                                                      | CTGGT                                                  | In_Frame_Del      | DEL |
|    | POT1    | 7  | 124475296 | TAAACAAAAC<br>AAAACAAAAC<br>AAAACAAAAC<br>AAAA                | TAAACAAAAC<br>AAAACAAAAC<br>AAAACAAAAC                 | Splice_Site       | DEL |
|    | RECQL4  | 8  | 145737816 | C                                                             | T                                                      | Missense_Mutation | SNP |
|    | PTCH1   | 9  | 98209594  | G                                                             | A                                                      | Missense_Mutation | SNP |
|    | KAT6B   | 10 | 76781905  | GGAAGAAGAA<br>GAAGAAGAAG<br>AAGAA                             | GGAAGAAGAA<br>GAAGAAGAAG<br>AA                         | In_Frame_Del      | DEL |
|    | MAML2   | 11 | 95825374  | TTGCTGCTGCT<br>GCTGCTGCTGC<br>TGCTGCTGCTG<br>CTGCTGCTG        | TTGCTGCTGCT<br>GCTGCTGCTGC<br>TGCTGCTGCTG              | In_Frame_Del      | DEL |
|    | CREB3L1 | 11 | 46342259  | AGG                                                           | AGGG                                                   | Frame_Shift_Ins   | INS |
|    | KMT2D   | 12 | 49434910  | A                                                             | T                                                      | Missense_Mutation | SNP |
|    | ZNF384  | 12 | 6777069   | TTGCTGCTGCT<br>GCTGCTGCTGC<br>TGCTGCTGCTG<br>CTGCTGCTGCT<br>G | TTGCTGCTGCT<br>GCTGCTGCTGC<br>TGCTGCTGCTG<br>CTGCTGCTG | In_Frame_Del      | DEL |
|    | GPHN    | 14 | 67576863  | C                                                             | G                                                      | Missense_Mutation | SNP |
|    | TSC2    | 16 | 2134572   | C                                                             | G                                                      | Missense_Mutation | SNP |
|    | CIITA   | 16 | 10989219  | C                                                             | G                                                      | Missense_Mutation | SNP |
|    | RNF43   | 17 | 56436109  | C                                                             | T                                                      | Missense_Mutation | SNP |
|    | SETBP1  | 18 | 42456670  | C                                                             | CTCTT                                                  | Frame_Shift_Ins   | INS |
|    | PPP2R1A | 19 | 52725428  | C                                                             | T                                                      | Missense_Mutation | SNP |
|    | TMPRSS2 | 21 | 42852497  | C                                                             | T                                                      | Missense_Mutation | SNP |
|    | BCR     | 22 | 23603140  | G                                                             | C                                                      | Missense_Mutation | SNP |
|    | CLTCL1  | 22 | 19189003  | AC                                                            | ACC                                                    | Splice_Site       | INS |
| P5 | NTRK1   | 1  | 156814027 | G                                                             | A                                                      | Missense_Mutation | SNP |
|    | HOXD11  | 2  | 176972817 | G                                                             | A                                                      | Missense_Mutation | SNP |
|    | FBXO11  | 2  | 48066912  | T                                                             | C                                                      | Splice_Site       | SNP |
|    | MITF    | 3  | 69788786  | T                                                             | C                                                      | Missense_Mutation | SNP |
|    | WWTR1   | 3  | 149238595 | C                                                             | CTTAA                                                  | Nonsense_Mutation | INS |
|    | KDR     | 4  | 55972974  | T                                                             | A                                                      | Missense_Mutation | SNP |
|    | PHOX2B  | 4  | 41747995  | CGCCGCTGCC<br>GCTGCCGCCG<br>CCGCCGCTGC<br>CGC                 | CGCCGC                                                 | In_Frame_Del      | DEL |
|    | FGFR4   | 5  | 176520243 | G                                                             | A                                                      | Missense_Mutation | SNP |
|    | IL7R    | 5  | 35867500  | G                                                             | A                                                      | Missense_Mutation | SNP |
|    | MAP3K1  | 5  | 56177848  | TCAACAACAA<br>CAACAACAAC<br>AACAACA                           | TCAACAACAA<br>CAACAACAAC<br>AACA                       | In_Frame_Del      | DEL |
|    | ROS1    | 6  | 117650532 | C                                                             | G                                                      | Missense_Mutation | SNP |
|    | CCND3   | 6  | 41903782  | A                                                             | C                                                      | Missense_Mutation | SNP |
|    | CREB3L2 | 7  | 137612913 | CTGGTGGT                                                      | CTGGT                                                  | In_Frame_Del      | DEL |
|    | POT1    | 7  | 124475296 | TAAACAAAAC<br>AAAACAAAAC<br>AAAACAAAAC<br>AAAA                | TAAACAAAAC<br>AAAACAAAAC<br>AAAACAAAAC                 | Splice_Site       | INS |

|    |         |        |           |                                                               |                                                                                                                |                                               |              |     |
|----|---------|--------|-----------|---------------------------------------------------------------|----------------------------------------------------------------------------------------------------------------|-----------------------------------------------|--------------|-----|
|    | RECQL4  | 8      | 145738767 | CGG                                                           | CG                                                                                                             | Frame_Shift_Del                               | DEL          |     |
|    | PTCH1   | 9      | 98209594  | G                                                             | A                                                                                                              | Missense_Mutation                             | SNP          |     |
|    | CCDC6   | 10     | 61552692  | G                                                             | T                                                                                                              | Missense_Mutation                             | SNP          |     |
|    | RET     | 10     | 43600607  | C                                                             | A                                                                                                              | Missense_Mutation                             | SNP          |     |
|    | KAT6B   | 10     | 76781905  | GGAAGAAGAA<br>GAAGAAGAAG<br>AAGAA                             | GGAAGAAGAA<br>GAAGAAGAAG<br>AA                                                                                 | In_Frame_Del                                  | DEL          |     |
|    | EXT2    | 11     | 44129444  | G                                                             | A                                                                                                              | Missense_Mutation                             | SNP          |     |
|    | CREB3L1 | 11     | 46342259  | AGG                                                           | AGGG                                                                                                           | Frame_Shift_Ins                               | INS          |     |
|    | MAML2   | 11     | 95825374  | TTGCTGCTGCT<br>GCTGCTGCTGC<br>TGCTGCTGCTG<br>CTGCTGCTG        | TTGCTGCTGCT<br>GCTGCTGCTGC<br>TGCTGCTGCTG                                                                      | In_Frame_Del                                  | DEL          |     |
|    | COL2A1  | 12     | 48368604  | C                                                             | T                                                                                                              | Missense_Mutation                             | SNP          |     |
|    | ZNF384  | 12     | 6777069   | TTGCTGCTGCT<br>GCTGCTGCTGC<br>TGCTGCTGCTG<br>CTGCTGCTGCT<br>G | TTGCTGCTGCT<br>GCTGCTGCTGC<br>TGCTGCTGCTG<br>CTGCTGCTG,T<br>TGCTGCTGCTG<br>CTGCTGCTGCT<br>GCTGCTGCTGC<br>TGCTG | In_Frame_Del                                  | INS          |     |
|    | TRIP11  | 14     | 92460227  | C                                                             | T                                                                                                              | Missense_Mutation                             | SNP          |     |
|    | CIITA   | 16     | 10989219  | C                                                             | G                                                                                                              | Missense_Mutation                             | SNP          |     |
|    | CIITA   | 16     | 11001421  | C                                                             | A                                                                                                              | Missense_Mutation                             | SNP          |     |
|    | TSC2    | 16     | 2115529   | C                                                             | T                                                                                                              | Missense_Mutation                             | SNP          |     |
|    | FANCA   | 16     | 89836354  | G                                                             | A                                                                                                              | Missense_Mutation                             | SNP          |     |
|    | TMPRSS2 | 21     | 42852497  | C                                                             | T                                                                                                              | Missense_Mutation                             | SNP          |     |
|    | CLTCL1  | 22     | 19189003  | AC                                                            | ACC                                                                                                            | Splice_Site                                   | INS          |     |
| P6 | SH3GL1  | 19     | 4363448   | G                                                             | A                                                                                                              | Missense_Mutation                             | SNP          |     |
|    | NOTCH1  | 9      | 139399458 | G                                                             | A                                                                                                              | Missense_Mutation                             | SNP          |     |
|    | NTRK1   | 1      | 156844186 | C                                                             | A                                                                                                              | Missense_Mutation                             | SNP          |     |
|    | FANCA   | 16     | 89849320  | T                                                             | C                                                                                                              | Missense_Mutation                             | SNP          |     |
|    | PTCH1   | 9      | 98209594  | G                                                             | A                                                                                                              | Missense_Mutation                             | SNP          |     |
|    | CCND3   | 6      | 41903782  | A                                                             | C                                                                                                              | Missense_Mutation                             | SNP          |     |
|    | BCR     | 22     | 23610679  | G                                                             | A                                                                                                              | Missense_Mutation                             | SNP          |     |
|    | AXIN2   | 17     | 63531768  | G                                                             | A                                                                                                              | Missense_Mutation                             | SNP          |     |
|    | RECQL4  | 8      | 145737816 | C                                                             | T                                                                                                              | Missense_Mutation                             | SNP          |     |
|    | GRIN2A  | 16     | 9857974   | C                                                             | T                                                                                                              | Missense_Mutation                             | SNP          |     |
|    | TMPRSS2 | 21     | 42852497  | C                                                             | T                                                                                                              | Missense_Mutation                             | SNP          |     |
|    | CIITA   | 16     | 11001757  | C                                                             | T                                                                                                              | Missense_Mutation                             | SNP          |     |
|    | PDE4DIP | 1      | 145075683 | C                                                             | T                                                                                                              | Nonsense_Mutation                             | SNP          |     |
|    | CIITA   | 16     | 10989219  | C                                                             | G                                                                                                              | Missense_Mutation                             | SNP          |     |
|    | CCDC6   | 10     | 61552692  | G                                                             | T                                                                                                              | Missense_Mutation                             | SNP          |     |
|    | WHSC1   | 4      | 1920323   | G                                                             | T                                                                                                              | Missense_Mutation                             | SNP          |     |
|    | HOXA11  | 7      | 27224469  | C                                                             | T                                                                                                              | Missense_Mutation                             | SNP          |     |
|    | RECQL4  | 8      | 145738767 | CGG                                                           | CG                                                                                                             | Frame_Shift_Del                               | DEL          |     |
|    |         | PHOX2B | 4         | 41747989                                                      | AGCTGCCGCC<br>GCTGCCGCTG<br>CCGCCCGCG<br>CGCTGCCGC                                                             | AGCTGCCGCC<br>GCCGCCGCTG<br>CCGC              | In_Frame_Ins | DEL |
|    |         | TAF15  | 17        | 34171662                                                      | TGGCTATGGT<br>GGGGACAGAG<br>GCGGCGGCTA<br>TGGTGGGGAC<br>AGAGGAGGCG<br>GCTATGG                                  | TGGCTATGGT<br>GGGGACAGAG<br>GAGGCGGCTA<br>TGG | In_Frame_Ins | DEL |

|    |          |    |           |                                                               |                                                             |                   |     |
|----|----------|----|-----------|---------------------------------------------------------------|-------------------------------------------------------------|-------------------|-----|
|    | POT1     | 7  | 124475296 | TAAACAAAAC<br>AAAACAAAAC<br>AAAACAAAAC<br>AAAA                | TAAACAAAAC<br>AAAACAAAAC<br>AAAACAAAAC<br>AAAACAAAAC        | Splice_Site       | INS |
|    | CDC42EP1 | 22 | 37964408  | CCAGCGCCTG<br>CTGCAAACCC<br>CTCAGC                            | CCAGC                                                       | In_Frame_Del      | DEL |
|    | AKAP9    | 7  | 91652178  | AAAC                                                          | AAACAAC                                                     | In_Frame_Ins      | INS |
|    | MAML2    | 11 | 95825374  | TTGCTGCTGCT<br>GCTGCTGCTGC<br>TGCTGCTGCTG<br>CTGCTGCTG        | TTGCTGCTGCT<br>GCTGCTGCTGC<br>TGCTGCTGCTG                   | In_Frame_Del      | DEL |
|    | FUS      | 16 | 31196402  | TGGCGGCGGC<br>GGCGGCGGCG<br>G                                 | TGGCGGCGGC<br>GGCGGCGGCG<br>GCGG                            | In_Frame_Ins      | INS |
|    | ZNF384   | 12 | 6777069   | TTGCTGCTGCT<br>GCTGCTGCTGC<br>TGCTGCTGCTG<br>CTGCTGCTGCT<br>G | TTGCTGCTGCT<br>GCTGCTGCTGC<br>TGCTGCTGCTG<br>CTGCTGCTG      | In_Frame_Del      | DEL |
|    | CREB3L1  | 11 | 46342259  | AGG                                                           | AGGG                                                        | Frame_Shift_Ins   | INS |
|    | KAT6B    | 10 | 76781905  | GGAAGAAGAA<br>GAAGAAGAAG<br>AAGAA                             | GGAAGAAGAA<br>GAAGAAGAAG<br>AA                              | In_Frame_Del      | DEL |
|    | CLTCL1   | 22 | 19189003  | AC                                                            | ACC                                                         | Splice_Site       | INS |
|    | PCM1     | 8  | 17827260  | AC                                                            | ACC                                                         | Splice_Site       | INS |
|    | SETBP1   | 18 | 42456670  | C                                                             | CTCTT                                                       | Frame_Shift_Ins   | INS |
|    | CREB3L2  | 7  | 137612913 | CTGGTGGT                                                      | CTGGT                                                       | In_Frame_Del      | DEL |
| P7 | ATIC     | 2  | 216191608 | A                                                             | G                                                           | Missense_Mutation | SNP |
|    | NCOA1    | 2  | 24952478  | TCTCCT                                                        | TCT                                                         | In_Frame_Del      | DEL |
|    | PBRM1    | 3  | 52584431  | TCT                                                           | TCTCCT                                                      | Splice_Site       | INS |
|    | KDR      | 4  | 55972974  | T                                                             | A                                                           | Missense_Mutation | SNP |
|    | PHOX2B   | 4  | 41747989  | AGCTGCCGCC<br>GCTGCCGCTG<br>CCGCCCGCGC<br>CGCTGCCGC           | AGCTGCCGCC<br>GCCGCCGCTG<br>CCGC                            | In_Frame_Ins      | DEL |
|    | CCND3    | 6  | 41903782  | A                                                             | C                                                           | Missense_Mutation | SNP |
|    | TFEB     | 6  | 41652540  | G                                                             | T                                                           | Missense_Mutation | SNP |
|    | CREB3L2  | 7  | 137612913 | CTGGTGGT                                                      | CTGGT                                                       | In_Frame_Del      | DEL |
|    | POT1     | 7  | 124475296 | TAAACAAAAC<br>AAAACAAAAC<br>AAAACAAAAC<br>AAAA                | TAAACAAAAC<br>AAAACAAAAC<br>AAAACAAAAC<br>AAAACAAAAC<br>AAA | Splice_Site       | INS |
|    | TRRAP    | 7  | 98490062  | G                                                             | A                                                           | Missense_Mutation | SNP |
|    | IKKB     | 8  | 42177163  | G                                                             | A                                                           | Missense_Mutation | SNP |
|    | PCM1     | 8  | 17827260  | AC                                                            | ACC                                                         | Splice_Site       | INS |
|    | RECQL4   | 8  | 145738767 | CGG                                                           | CG                                                          | Frame_Shift_Del   | DEL |
|    | CCDC6    | 10 | 61552692  | G                                                             | T                                                           | Missense_Mutation | SNP |
|    | CREB3L1  | 11 | 46342259  | AGG                                                           | AGGG                                                        | Frame_Shift_Ins   | INS |
|    | DDX10    | 11 | 108788634 | GTGATGATGA<br>TGATGATGAT<br>GATGATG                           | GTGATGATGA<br>TGATGATGAT<br>GATGATGATG<br>ATG               | In_Frame_Ins      | INS |
|    | MAML2    | 11 | 95825374  | TTGCTGCTGCT<br>GCTGCTGCTGC<br>TGCTGCTGCTG<br>CTGCTGCTG        | TTGCTGCTGCT<br>GCTGCTGCTGC<br>TGCTGCTGCTG                   | In_Frame_Del      | DEL |
|    | KDM5A    | 12 | 432374    | TACAAAAAAA<br>AAAAAAA                                         | TAAAAAAA<br>AAAAAAA                                         | Splice_Site       | DEL |

|  |        |    |           |                                                               |                                                                                  |                   |     |
|--|--------|----|-----------|---------------------------------------------------------------|----------------------------------------------------------------------------------|-------------------|-----|
|  |        |    |           | AAAAAAAAA                                                     |                                                                                  |                   |     |
|  | KDM5A  | 12 | 432374    | TACAAAAAAAAA<br>AAAAAAAAAAAA<br>AAAAAAAAAAAA                  | TAAAAAAAAAAA<br>AAAAAAAAAA                                                       | Splice_Site       | DEL |
|  | TBX3   | 12 | 115112055 | G                                                             | A                                                                                | Missense_Mutation | SNP |
|  | ZNF384 | 12 | 6777069   | TTGCTGCTGCT<br>GCTGCTGCTGC<br>TGCTGCTGCTG<br>CTGCTGCTGCT<br>G | TTGCTGCTGCT<br>GCTGCTGCTGC<br>TGCTGCTGCTG<br>CTGCTGCTGCT<br>GCTGCTGCTGC<br>TGCTG | In_Frame_Del      | INS |
|  | NTRK3  | 15 | 88576178  | C                                                             | T                                                                                | Missense_Mutation | SNP |
|  | CIITA  | 16 | 10989219  | C                                                             | G                                                                                | Missense_Mutation | SNP |
|  | SETBP1 | 18 | 42456670  | C                                                             | CTCTT                                                                            | Frame_Shift_Ins   | INS |
|  | CLTCL1 | 22 | 19189003  | AC                                                            | ACC                                                                              | Splice_Site       | INS |
|  | MN1    | 22 | 28194933  | TTGCTGCTGCT<br>GCTGCTGCTGC<br>TGCTGCTG                        | TTGCTGCTGCT<br>GCTGCTGCTGC<br>TGCTGCTGCTG                                        | In_Frame_Ins      | INS |
|  | ZRSR2  | X  | 15821890  | G                                                             | A                                                                                | Missense_Mutation | SNP |

**Supplementary Table 7:** the number of ubiquitous and private CNVs

| Patient | Common | HCC | iCCA |
|---------|--------|-----|------|
| P1      | 17     | 410 | 550  |
| P2      | 2      | 300 | 71   |
| P3      | 42     | 183 | 152  |
| P4      | 36     | 244 | 336  |
| P5      | 0      | 121 | 205  |
| P6      | 0      | 178 | 240  |
| P7      | 5      | 90  | 182  |

**Supplementary Table 8:** The distribution of driver mutation genes in evolutionary tree

| Patient | Trunk                                                                       | Branch (HCC)                                                | Branch (iCCA)      |
|---------|-----------------------------------------------------------------------------|-------------------------------------------------------------|--------------------|
| P1      | TP53, PTPRC                                                                 | USP28, MEF2A, LRIF1, GRZN2A,<br>FGFR1 EML4, ARHGAP35, AKAP9 | NF2, HUWE1, CDH1   |
| P2      | CARD11, CBLB, DMD, H3F3A, OLIG2, PTPN13<br>SPTAN1, ZFH3                     | SND1, TCEA1                                                 | -                  |
| P3      | CACNA1D, FOXP1, PDGFRA, SOS1, TP53<br>ZFP36L2                               | ERCC4, HOOK3, METAP1, PIK3CB<br>PRPF8                       | ACKR3, ACVZA       |
| P4      | FANCC, KAT6B, RBM10, RBM15, TP53                                            | AFF3, QKI                                                   | MYO5A, NEB, SYNE1  |
| P5      | CIITA, JMJD1C, KALRN, MED13                                                 | 5-seq, ACVR2A, MTOR, NFATC2,<br>RUNX1T1                     | SYE1               |
| P6      | ANKRD11, ARID1B, ASPM, FBXO11, HUWE1,<br>MET, PIK3R1, PTPN13, TP53, TP53BP1 | AHDC1, APC, LMNA, NCOA4                                     | ADCY1, GMPS, NIPBL |
| P7      | BAP1, CDKN2A                                                                | CHN1, H3F3A                                                 | ACSL6              |

**Supplementary Table 9:** Mutation SMGs associated with stem cell and differentiation

| #Gene  | Variant classification | Indels | Variant classification | SNVs | Tot Muts | Sample Affect | Sample Percent (%) | Patient number | P-value CT  | FDR CT   |
|--------|------------------------|--------|------------------------|------|----------|---------------|--------------------|----------------|-------------|----------|
| TP53   | Frameshift             | 4      | Missense               | 4    | 8        | 8             | 57.14              | 4              | 1.89E-18    | 3.63E-14 |
| ACVR2A | -                      | 0      | Missense               | 2    | 2        | 2             | 14.29              | 2              | 0.001206077 | 0.092    |



|        |            |   |                   |   |   |   |       |   |             |       |
|--------|------------|---|-------------------|---|---|---|-------|---|-------------|-------|
| ANO3   | -          | 0 | Missense          | 4 | 4 | 3 | 21.43 | 2 | 0.0000159   | 0.013 |
| ARID1B | -          | 0 | Missense          | 4 | 4 | 4 | 28.57 | 2 | 0.0000543   | 0.023 |
| ASXL3  | -          | 0 | Missense/Nonsense | 3 | 3 | 3 | 21.43 | 3 | 0.000307308 | 0.046 |
| BBS12  | Frameshift | 2 | Missense          | 1 | 3 | 3 | 21.43 | 2 | 0.00000395  | 0.007 |
| FCGBP  | Frameshift | 1 | Missense          | 5 | 6 | 5 | 35.71 | 3 | 0.0000133   | 0.013 |
| FREM1  | -          | 0 | Missense          | 4 | 4 | 4 | 28.57 | 2 | 0.0000357   | 0.02  |
| GRM1   | -          | 0 | Missense/Nonsense | 4 | 4 | 4 | 28.57 | 2 | 0.00000602  | 0.008 |
| HGFAC  | -          | 0 | Missense          | 2 | 2 | 2 | 14.29 | 2 | 0.003517695 | 0.189 |
| MORC1  | -          | 0 | Missense/Nonsense | 4 | 4 | 4 | 28.57 | 2 | 0.00000248  | 0.005 |
| MUC2   | -          | 0 | Missense          | 3 | 3 | 3 | 21.43 | 2 | 0.003351305 | 0.181 |
| MUC4   | -          | 0 | Missense          | 5 | 5 | 2 | 14.29 | 2 | 0.000761952 | 0.069 |
| NFATC3 | -          | 0 | Missense          | 4 | 4 | 4 | 28.57 | 2 | 0.0000047   | 0.008 |
| RELN   | -          | 0 | Missense          | 3 | 3 | 3 | 21.43 | 2 | 0.00209337  | 0.129 |
| TBC1D9 | -          | 0 | Missense          | 3 | 3 | 3 | 21.43 | 2 | 0.000107379 | 0.03  |
| VCAN   | -          | 0 | Missense          | 3 | 3 | 3 | 21.43 | 2 | 0.00098821  | 0.082 |

**Supplementary Table 10: Mutation genes in the signaling pathways regulating pluripotency of stem cells**

| #Gene  | Variant classification | Indels | Variant classification | SNVs | Tot Muts | Sample Affect | Sample Percent (%) | Sample |
|--------|------------------------|--------|------------------------|------|----------|---------------|--------------------|--------|
| ACVR2A | -                      | 0      | Missense               | 2    | 2        | 2             | 14.29              | P3, P5 |
| FZD9   | -                      | 0      | Missense               | 2    | 2        | 2             | 14.29              | P5     |
| ZFH3   | -                      | 0      | Missense               | 2    | 2        | 2             | 14.29              | P5     |
| PIK3R1 | -                      | 0      | Missense               | 2    | 2        | 2             | 14.29              | P6     |
| WNT16  | -                      | 0      | Missense               | 2    | 2        | 2             | 14.29              | P4     |
| HAND1  | -                      | 0      | Missense               | 2    | 2        | 2             | 14.29              | P5     |
| PIK3CB | -                      | 0      | Missense               | 1    | 1        | 1             | 7.15               | P3     |
| ESX1   | -                      | 0      | Missense               | 1    | 1        | 1             | 7.15               | P6     |
| DUSP9  | -                      | 0      | Missense               | 1    | 1        | 1             | 7.15               | P1     |
| SKIL   | -                      | 0      | Missense               | 1    | 1        | 1             | 7.15               | P4     |
| APC    | -                      | 0      | Missense               | 1    | 1        | 1             | 7.15               | P6     |
| FGFR1  | -                      | 0      | Missense               | 1    | 1        | 1             | 7.15               | P1     |

**Supplementary Table 11: Mutation genes in the Wnt and Notch Pathways**

| #Gene  | Variant classification | Indels | Variant classification | SNVs | Tot Muts | Sample Affect | Sample Percent (%) | Sample         | Pathway |
|--------|------------------------|--------|------------------------|------|----------|---------------|--------------------|----------------|---------|
| TP53   | Frameshift             | 4      | Missense               | 4    | 8        | 8             | 57.14              | P1, P3, P4, P6 | Wnt     |
| NFATC3 | -                      | 0      | Missense               | 4    | 4        | 4             | 28.57              | P1, P4         | Wnt     |

|        |   |   |          |   |   |   |       |    |       |
|--------|---|---|----------|---|---|---|-------|----|-------|
| FZD9   | - | 0 | Missense | 2 | 2 | 2 | 14.29 | P5 | Wnt   |
| WNT16  | - | 0 | Missense | 2 | 2 | 2 | 14.29 | P4 | Wnt   |
| NFATC2 | - | 0 | Missense | 1 | 1 | 1 | 7.15  | P5 | Wnt   |
| APC    | - | 0 | Missense | 1 | 1 | 1 | 7.15  | P6 | Wnt   |
| CTBP1  | - | 0 | Missense | 1 | 1 | 1 | 7.15  | P1 | Wnt   |
| DKK1   | - | 0 | Missense | 1 | 1 | 1 | 7.15  | P6 | Wnt   |
| VANGL1 | - | 0 | Missense | 1 | 1 | 1 | 7.15  | P6 | Wnt   |
| CTBP2  | - | 0 | Missense | 1 | 1 | 1 | 7.15  | P1 | Wnt   |
| JAG1   | - | 0 | Nonsense | 1 | 1 | 1 | 7.15  | P6 | Notch |
| NUMB   | - | 0 | Missense | 1 | 1 | 1 | 7.15  | P4 | Notch |

**Supplementary Table 12: Tumor purity and cellularity**

| Sample | Purity (Pathologist) | Purity (ABSOLUTE) | ploidy |
|--------|----------------------|-------------------|--------|
| C1     | 0.8                  | 0.58              | 4.88   |
| C2     | 0.8                  | 0.8               | 5.38   |
| C3     | 0.85                 | 0.66              | 4.57   |
| C4     | 0.8                  | 0.75              | 5.24   |
| C5     | 0.9                  | 0.8               | 5.8    |
| C6     | 0.9                  | 0.5               | 3.13   |
| C7     | 0.8                  | 0.5               | 2.28   |
| H1     | 0.9                  | 0.7               | 5      |
| H2     | 0.9                  | 0.8               | 4.38   |
| H3     | 0.85                 | 0.5               | 2.6    |
| H4     | 0.9                  | 0.8               | 4.77   |
| H5     | 0.9                  | 0.66              | 4.08   |
| H6     | 0.9                  | 0.66              | 4.37   |
| H7     | 0.9                  | 0.66              | 3.78   |
