# Supplementary material for: Whole-exome sequencing reveals the origin and evolution of hepato-cholangiocarcinoma
Source: PubMed Central journal article supplement (PMC5832792; doi:10.1038/s41467-018-03276-y), 2018-03-01
Supplement: 41467_2018_3276_MOESM3_ESM.pdf [file 41467_2018_3276_MOESM3_ESM.pdf]

## Description of Additional Supplementary Files

File Name: Supplementary Data 1

Description: Information of 75 included liver cancer patients

File Name: Supplementary Data 2

Description: Distribution of nonsynonymous somatic mutations of 7 H-ChC patients; GT: genotype (homozygote:0/0; heterozygote: 0/1); AD: allelic depths; BQ: base quality; DP: depth; FA: allelic frequency; SS: mutation type (0: wild type; 1: germline mutation; 2: somatic mutation; 3: LOH; 4: post-transcriptional modification; 5 : unknown information.

File Name: Supplementary Data 3

Description: The distribution of somatic CNVs
